# Supplementary material for: Base-mediated trimerization of enones under solvent-free and ball-milling conditions
Source: Royal Society of Chemistry journal article supplement (doi:10.1039/d3mr00010a), 2024-01-01
Supplement: d3mr00010a1.pdf [file d3mr00010a1.pdf]

# Electronic Supplementary Information

## Base-mediated trimerization of enones under solvent-free and ball-milling conditions

Gang Shao,<sup>†</sup> Pinhua Li,<sup>†,‡</sup> Zheng-Chun Yin,<sup>†</sup> Jun-Shen Chen,<sup>†</sup> Xu-Ling Xia<sup>†</sup> and Guan-Wu Wang<sup>\*,†,§</sup>

<sup>†</sup>Hefei National Research Center for Physical Sciences at the Microscale and Department of Chemistry, University of Science and Technology of China, Hefei, Anhui 230026, P. R. China

E-mail: [gwang@ustc.edu.cn](mailto:gwang@ustc.edu.cn)

<sup>‡</sup>Department of Chemistry, Anhui Polytechnic University, Wuhu 241000, P. R. China

<sup>§</sup>State Key Laboratory of Applied Organic Chemistry, Lanzhou University, Lanzhou, Gansu 730000, P. R. China

### Table of Contents

|                                                                                                  |     |
|--------------------------------------------------------------------------------------------------|-----|
| 1. General information .....                                                                     | S2  |
| 2. Mechanochemistry and spectral data of products <b>2a–2t</b> and <b>2a'</b> .....              | S2  |
| 3. Liquid-phase reaction of <b>1a</b> with KO <sup>t</sup> Bu and H <sub>2</sub> O .....         | S10 |
| 4. Control experiments .....                                                                     | S10 |
| 5. Mechanochemistry of products <b>4a</b> and <b>4q</b> .....                                    | S13 |
| 6. X-ray data of product <b>2a</b> .....                                                         | S14 |
| 7. References .....                                                                              | S16 |
| 8. NMR spectra of products <b>2a–2v</b> , <b>2a'</b> , <b>3a</b> , <b>4a</b> and <b>4q</b> ..... | S17 |

## 1. General information

Enones **1** were prepared by following the literature procedure.<sup>1</sup> Commercially available reagents were used without further purification. NMR spectra were recorded on a Bruker Advance III HD 400 NMR spectrometer (Bruker BioSpin AG, Fällanden, Switzerland; 400 MHz for <sup>1</sup>H NMR; 101 MHz for <sup>13</sup>C NMR) and a Bruker Advance III HD 500 NMR spectrometer (Bruker BioSpin AG, Fällanden, Switzerland; 500 MHz for <sup>1</sup>H NMR; 126 MHz for <sup>13</sup>C NMR). <sup>1</sup>H NMR chemical shifts were determined relative to TMS at 0.00 ppm or residual CDCl<sub>3</sub> at  $\delta$  7.26 ppm or residual DMSO-*d*<sub>6</sub> at  $\delta$  2.50 ppm. <sup>13</sup>C NMR chemical shifts were determined relative to TMS at 0.00 ppm or CDCl<sub>3</sub> at  $\delta$  77.16 ppm. Data for <sup>1</sup>H NMR and <sup>13</sup>C NMR are reported as follows: chemical shift ( $\delta$ , ppm), multiplicity (s = singlet, d = doublet, t = triplet, m = multiplet). High-resolution mass spectra (HRMS) were taken on a Waters Acquity UPLC-Xevo G2 QToF mass spectrometer (Waters, Milford, MA, USA) with FTMS-ESI in positive mode. Ball-milling reactions were performed in a Retsch MM400 mixer mill (Retsch GmbH, Haan, Germany), using a 5 mL stainless-steel jar with four 5-mm diameter stainless-steel balls and were milled at a frequency of 1800 rounds per minute (30 Hz) at room temperature.

## 2. Mechanochemistry and spectral data of products **2a–2t** and **2a'**

**General procedure for the mechanochemical synthesis of products **2a–2t**:** A mixture of enone **1a** (**1b–1t**, 0.20 mmol) with KO<sup>t</sup>Bu (0.40 mmol) and H<sub>2</sub>O (0.60 mmol) together with four stainless-steel balls (5-mm in diameter) was introduced into a stainless-steel jar (5 mL). The reaction vessel along with another identical vessel was closed and fixed on the vibration arms of a Retsch MM400 mixer mill and vibrated at a rate of 1800 rounds per minute (30 Hz) at room temperature for 1.5 h. After completion of the reaction, the resulting mixture was combined by washing with ethyl acetate. Then, the reaction mixture was filtered through a silica gel plug with ethyl acetate as the eluent and evaporated in a vacuum. The residue was separated by flash column chromatography on silica gel with ethyl acetate/petroleum ether (2:1) as the eluent to afford product **2a** (**2b–2t**).

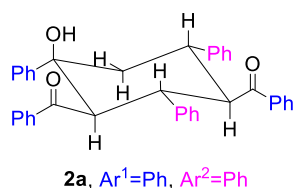

**Synthesis and spectral data of **2a**:** By following the general procedure, the reaction of **1a** (41.6 mg, 0.20 mmol) with KO<sup>t</sup>Bu (44.9 mg, 0.40 mmol) and H<sub>2</sub>O (10.0  $\mu$ L, 0.60 mmol) afforded **2a** (34.0 mg, 95% yield) as a white solid.

<sup>1</sup>H NMR (400 MHz, CDCl<sub>3</sub>)  $\delta$  7.55 (d,  $J$  = 7.5 Hz, 2H), 7.30–6.95 (m, 20H), 6.83 (t,  $J$  = 7.7 Hz, 2H), 6.72 (t,  $J$  = 7.4 Hz, 1H), 5.40 (d,  $J$  = 2.2 Hz, 1H), 4.49 (d,  $J$  = 11.0 Hz, 1H), 4.27–4.13 (m, 2H), 4.11–4.00 (m, 1H), 2.51 (t,  $J$  = 14.0 Hz, 1H), 2.26 (dd,  $J$  = 14.0, 3.5 Hz, 1H). Product **2a** is a known compound, and its <sup>1</sup>H NMR data are consistent with those reported in the literature.<sup>2a, 2b</sup>

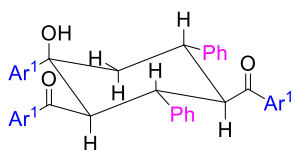

**2b**, Ar<sup>1</sup>=*p*-CH<sub>3</sub>OC<sub>6</sub>H<sub>4</sub>, Ar<sup>2</sup>=Ph

**Synthesis and spectral data of 2b:** By following the general procedure, the reaction of **1b** (47.6 mg, 0.20 mmol) with KO<sup>t</sup>Bu (44.8 mg, 0.40 mmol) and H<sub>2</sub>O (10.0 μL, 0.60 mmol) afforded **2b** (35.9 mg, 86% yield) as a white solid.

<sup>1</sup>H NMR (400 MHz, CDCl<sub>3</sub>) δ 7.45 (d, *J* = 8.8 Hz, 2H), 7.38–7.30 (m, 4H), 7.29–7.23 (m, 2H), 7.18–7.05 (m, 4H), 6.97 (t, *J* = 7.3 Hz, 1H), 6.84 (t, *J* = 7.6 Hz, 2H), 6.75–6.67 (m, 3H), 6.56–6.49 (m, 4H), 5.56 (d, *J* = 2.0 Hz, 1H), 4.44–4.34 (m, 1H), 4.20–4.11 (m, 2H), 4.09–3.96 (m, 1H), 3.71 (s, 3H), 3.69 (s, 3H), 3.67 (s, 3H), 2.44 (t, *J* = 13.9 Hz, 1H), 2.20 (dd, *J* = 13.9, 3.5 Hz, 1H). Product **2b** is a known compound, and its <sup>1</sup>H NMR data are consistent with those reported in the literature.<sup>2a</sup>

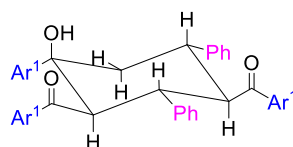

**2c**, Ar<sup>1</sup>=*m*-CH<sub>3</sub>OC<sub>6</sub>H<sub>4</sub>, Ar<sup>2</sup>=Ph

**Synthesis and spectral data of 2c:** By following the general procedure, the reaction of **1c** (47.7 mg, 0.20 mmol) with KO<sup>t</sup>Bu (44.6 mg, 0.40 mmol) and H<sub>2</sub>O (10.0 μL, 0.60 mmol) afforded **2c** (19.6 mg, 47% yield) as a white solid.

<sup>1</sup>H NMR (400 MHz, CDCl<sub>3</sub>) δ 7.27 (d, *J* = 9.7 Hz, 2H), 7.18–7.07 (m, 7H), 7.03–6.90 (m, 3H), 6.89–6.69 (m, 8H), 6.66 (s, 1H), 6.63–6.56 (m, 1H), 5.36 (d, *J* = 1.6 Hz, 1H), 4.49–4.41 (m, 1H), 4.22–4.10 (m, 2H), 4.08–3.96 (m, 1H), 3.70 (s, 3H), 3.62 (s, 3H), 3.60 (s, 3H), 2.48 (t, *J* = 14.0 Hz, 1H), 2.25 (dd, *J* = 14.0, 3.4 Hz, 1H).

<sup>13</sup>C NMR (126 MHz, CDCl<sub>3</sub>) δ 207.2, 203.8, 159.6, 159.0, 158.9, 147.8, 142.1, 140.6, 139.8, 138.6, 129.3, 128.8, 128.6, 128.5, 128.2, 128.1, 127.1, 126.9, 120.7, 120.1, 119.6, 118.7, 117.3, 112.5, 111.7, 111.4, 111.1, 75.5, 57.2, 57.0, 55.34, 55.31, 48.3, 45.9, 43.5. HRMS (ESI) *m/z*: Calcd for C<sub>41</sub>H<sub>38</sub>O<sub>6</sub>Na [M+Na]<sup>+</sup> 649.2561; found 649.2569.

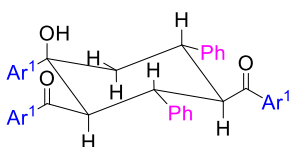

**2d**, Ar<sup>1</sup>=*p*-ClC<sub>6</sub>H<sub>4</sub>, Ar<sup>2</sup>=Ph

**Synthesis and spectral data of 2d:** By following the general procedure, the reaction of **1d** (48.7 mg, 0.20 mmol) with KO<sup>t</sup>Bu (44.9 mg, 0.40 mmol) and H<sub>2</sub>O (10.0 μL, 0.60 mmol) afforded **2d** (37.9 mg, 89% yield) as a white solid.

<sup>1</sup>H NMR (400 MHz, CDCl<sub>3</sub>) δ 7.47 (d, *J* = 8.6 Hz, 2H), 7.28–6.98 (m, 17H), 6.88 (t, *J* = 7.7 Hz, 2H), 6.78 (t, *J* = 7.3 Hz, 1H), 5.37 (d, *J* = 2.3 Hz, 1H), 4.42–4.33 (m, 1H), 4.19–4.09 (m, 2H), 4.06–3.95 (m, 1H), 2.42 (t, *J* = 14.0 Hz, 1H), 2.22 (dd, *J* = 14.0, 3.5

Hz, 1H). Product **2d** is a known compound, and its  $^1\text{H}$  NMR data are consistent with those reported in the literature.<sup>2a, 2b</sup>

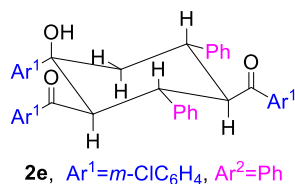

**Synthesis and spectral data of 2e:** By following the general procedure, the reaction of **1e** (48.1 mg, 0.20 mmol) with KO<sup>t</sup>Bu (44.7 mg, 0.40 mmol) and H<sub>2</sub>O (10.0  $\mu\text{L}$ , 0.60 mmol) afforded **2e** (38.3 mg, 90% yield) as a white solid.

$^1\text{H}$  NMR (500 MHz, CDCl<sub>3</sub>)  $\delta$  7.55 (t,  $J = 1.8$  Hz, 1H), 7.41 (d,  $J = 8.0$  Hz, 1H), 7.29–6.99 (m, 17H), 6.96 (t,  $J = 7.8$  Hz, 1H), 6.92 (t,  $J = 7.8$  Hz, 1H), 6.80 (t,  $J = 7.4$  Hz, 1H), 5.21 (d,  $J = 2.4$  Hz, 1H), 4.39 (d,  $J = 11.1$  Hz, 1H), 4.21–4.08 (m, 2H), 4.03–3.95 (m, 1H), 2.46 (t,  $J = 14.1$  Hz, 1H), 2.25 (dd,  $J = 14.1, 3.6$  Hz, 1H).

$^{13}\text{C}$  NMR (126 MHz, CDCl<sub>3</sub>)  $\delta$  205.5, 202.2, 147.8, 141.4, 140.2, 139.2, 138.1, 134.4, 134.1, 133.8, 132.9, 131.8, 129.7, 129.2, 129.0, 128.5, 128.4, 127.8, 127.7, 127.44, 127.42, 127.39, 127.1, 125.7, 125.31, 125.29, 122.9, 75.1, 56.82, 56.80, 47.8, 45.4, 43.3. HRMS (ESI)  $m/z$ : Calcd for C<sub>38</sub>H<sub>29</sub><sup>35</sup>Cl<sub>3</sub>O<sub>3</sub>Na [M+Na]<sup>+</sup> 661.1074; found 661.1073.

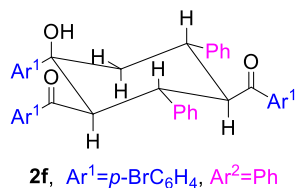

**Synthesis and spectral data of 2f:** By following the general procedure, the reaction of **1f** (57.8 mg, 0.20 mmol) with KO<sup>t</sup>Bu (44.9 mg, 0.40 mmol) and H<sub>2</sub>O (10.0  $\mu\text{L}$ , 0.60 mmol) afforded **2f** (36.4 mg, 71% yield) as a white solid.

$^1\text{H}$  NMR (400 MHz, CDCl<sub>3</sub>)  $\delta$  7.41 (d,  $J = 8.6$  Hz, 2H), 7.32 (d,  $J = 8.6$  Hz, 2H), 7.25–7.21 (m, 4H), 7.20–7.05 (m, 10H), 7.02 (t,  $J = 7.3$  Hz, 1H), 6.88 (t,  $J = 7.7$  Hz, 2H), 6.79 (t,  $J = 7.3$  Hz, 1H), 5.36 (d,  $J = 2.2$  Hz, 1H), 4.41–4.32 (m, 1H), 4.19–4.08 (m, 2H), 4.05–3.95 (m, 1H), 2.42 (t,  $J = 14.0$  Hz, 1H), 2.22 (dd,  $J = 14.0, 3.6$  Hz, 1H). Product **2f** is a known compound, and its  $^1\text{H}$  NMR data are consistent with those reported in the literature.<sup>2a, 2b</sup>

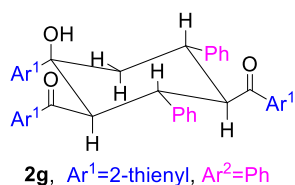

**Synthesis and spectral data of 2g:** By following the general procedure, the reaction of **1g** (42.8 mg, 0.20 mmol) with KO<sup>t</sup>Bu (44.7 mg, 0.40 mmol) and H<sub>2</sub>O (10.0  $\mu\text{L}$ , 0.60 mmol) afforded **2g** (29.6 mg, 80% yield) as a white solid.

$^1\text{H}$  NMR (400 MHz, CDCl<sub>3</sub>)  $\delta$  7.39 (d,  $J = 4.8$  Hz, 1H), 7.32 (d,  $J = 3.8$  Hz, 1H), 7.30–

7.28 (m, 2H), 7.24–7.17 (m, 2H), 7.13 (t,  $J = 7.5$  Hz, 3H), 7.03 (d,  $J = 5.2$  Hz, 2H), 6.98 (d,  $J = 3.5$  Hz, 1H), 6.94 (t,  $J = 7.6$  Hz, 2H), 6.84–6.74 (m, 5H), 5.77–5.67 (m, 1H), 4.24–4.12 (m, 2H), 4.07–3.90 (m, 2H), 2.50–2.32 (m, 2H).

$^{13}\text{C}$  NMR (126 MHz,  $\text{CDCl}_3$ )  $\delta$  196.4, 150.5, 143.5, 134.0, 132.3, 130.5, 127.2, 127.1, 126.8, 126.4, 126.1, 126.0, 125.7, 125.6, 122.8, 121.7, 73.5, 58.5, 46.2, 41.8, 28.6.

HRMS (ESI)  $m/z$ : Calcd for  $\text{C}_{32}\text{H}_{26}\text{O}_3\text{S}_3\text{Na}$   $[\text{M}+\text{Na}]^+$  577.0937; found 577.0945.

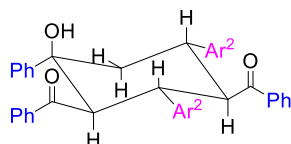

**2h**,  $\text{Ar}^1 = \text{Ph}$ ,  $\text{Ar}^2 = p\text{-CH}_3\text{OC}_6\text{H}_4$

**Synthesis and spectral data of 2h:** By following the general procedure, the reaction of **1h** (47.9 mg, 0.20 mmol) with  $\text{KO}^t\text{Bu}$  (44.7 mg, 0.40 mmol) and  $\text{H}_2\text{O}$  (10.0  $\mu\text{L}$ , 0.60 mmol) afforded **2h** (34.6 mg, 87% yield) as a white solid.

$^1\text{H}$  NMR (400 MHz,  $\text{CDCl}_3$ )  $\delta$  7.53 (d,  $J = 7.5$  Hz, 2H), 7.29–7.13 (m, 10H), 7.10–6.98 (m, 7H), 6.63 (d,  $J = 8.6$  Hz, 2H), 6.36 (d,  $J = 8.7$  Hz, 2H), 5.35 (d,  $J = 2.0$  Hz, 1H), 4.49–4.39 (m, 1H), 4.19–4.06 (m, 2H), 4.05–3.93 (m, 1H), 3.63 (s, 3H), 3.47 (s, 3H), 2.45 (t,  $J = 14.0$  Hz, 1H), 2.21 (dd,  $J = 14.0, 3.5$  Hz, 1H). Product **2h** is a known compound, and its  $^1\text{H}$  NMR data are consistent with those reported in the literature.<sup>2</sup>

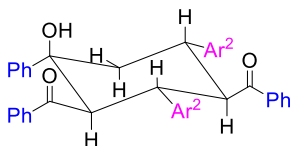

**2i**,  $\text{Ar}^1 = \text{Ph}$ ,  $\text{Ar}^2 = p\text{-CH}_3\text{C}_6\text{H}_4$

**Synthesis and spectral data of 2i:** By following the general procedure, the reaction of **1i** (43.8 mg, 0.20 mmol) with  $\text{KO}^t\text{Bu}$  (45.0 mg, 0.40 mmol) and  $\text{H}_2\text{O}$  (10.0  $\mu\text{L}$ , 0.60 mmol) afforded **2i** (23.7 mg, 63% yield) as a white solid.

$^1\text{H}$  NMR (400 MHz,  $\text{CDCl}_3$ )  $\delta$  7.53 (d,  $J = 7.7$  Hz, 2H), 7.29–7.11 (m, 10H), 7.08–6.96 (m, 7H), 6.88 (d,  $J = 7.7$  Hz, 2H), 6.62 (d,  $J = 7.8$  Hz, 2H), 5.35 (d,  $J = 1.7$  Hz, 1H), 4.45 (d,  $J = 11.0$  Hz, 1H), 4.25–4.08 (m, 2H), 4.05–3.95 (m, 1H), 2.47 (t,  $J = 14.1$  Hz, 1H), 2.21 (dd,  $J = 14.1, 3.3$  Hz, 1H), 2.12 (s, 3H), 1.91 (s, 3H). Product **2i** is a known compound, and its  $^1\text{H}$  NMR data are consistent with those reported in the literature.<sup>2a, 2b, 2c</sup>

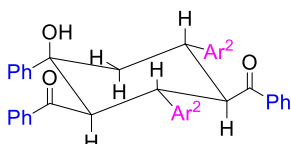

**2j**,  $\text{Ar}^1 = \text{Ph}$ ,  $\text{Ar}^2 = p\text{-ClC}_6\text{H}_4$

**Synthesis and spectral data of 2j:** By following the general procedure, the reaction of **1j** (48.0 mg, 0.20 mmol) with  $\text{KO}^t\text{Bu}$  (44.7 mg, 0.40 mmol) and  $\text{H}_2\text{O}$  (10.0  $\mu\text{L}$ , 0.60 mmol) afforded **2j** (31.8 mg, 79% yield) as a white solid.

$^1\text{H}$  NMR (400 MHz,  $\text{CDCl}_3$ )  $\delta$  7.53 (d,  $J = 7.7$  Hz, 2H), 7.32–7.15 (m, 10H), 7.14–7.02 (m, 9H), 6.80 (d,  $J = 8.4$  Hz, 2H), 5.34 (d,  $J = 1.8$  Hz, 1H), 4.48–4.40 (m, 1H), 4.21–4.09 (m, 2H), 4.08–3.97 (m, 1H), 2.45 (t,  $J = 14.0$  Hz, 1H), 2.22 (dd,  $J = 14.0, 3.3$  Hz, 1H). Product **2j** is a known compound, and its  $^1\text{H}$  NMR data are consistent with those reported in the literature.<sup>2a, 2b</sup>

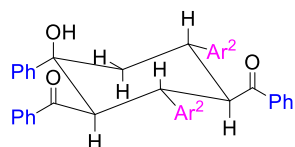

**2k**,  $\text{Ar}^1 = \text{Ph}$ ,  $\text{Ar}^2 = p\text{-BrC}_6\text{H}_4$

**Synthesis and spectral data of 2k:** By following the general procedure, the reaction of **1k** (56.8 mg, 0.20 mmol) with  $\text{KO}^t\text{Bu}$  (44.9 mg, 0.40 mmol) and  $\text{H}_2\text{O}$  (10.0  $\mu\text{L}$ , 0.60 mmol) afforded **2k** (40.6 mg, 88% yield) as a white solid.

$^1\text{H}$  NMR (400 MHz,  $\text{CDCl}_3$ )  $\delta$  7.52 (d,  $J = 7.5$  Hz, 2H), 7.31–7.16 (m, 10H), 7.16–7.04 (m, 7H), 7.04–6.98 (m, 2H), 7.04–6.92 (m, 2H), 5.32 (d,  $J = 2.0$  Hz, 1H), 4.48–4.40 (m, 1H), 4.20–4.08 (m, 2H), 4.07–3.96 (m, 1H), 2.45 (t,  $J = 14.0$  Hz, 1H), 2.22 (dd,  $J = 14.0, 3.4$  Hz, 1H). Product **2k** is a known compound, and its  $^1\text{H}$  NMR data are consistent with those reported in the literature.<sup>2a</sup>

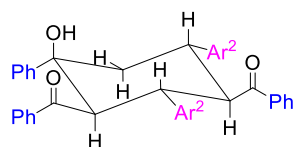

**2l**,  $\text{Ar}^1 = \text{Ph}$ ,  $\text{Ar}^2 = m\text{-BrC}_6\text{H}_4$

**Synthesis and spectral data of 2l:** By following the general procedure, the reaction of **1l** (57.6 mg, 0.20 mmol) with  $\text{KO}^t\text{Bu}$  (44.7 mg, 0.40 mmol) and  $\text{H}_2\text{O}$  (10.0  $\mu\text{L}$ , 0.60 mmol) afforded **2l** (36.4 mg, 79% yield) as a white solid.

$^1\text{H}$  NMR (400 MHz,  $\text{CDCl}_3$ )  $\delta$  7.55 (d,  $J = 8.2$  Hz, 2H), 7.47 (s, 1H), 7.40–7.23 (m, 6H), 7.21 (t,  $J = 7.5$  Hz, 2H), 7.17–6.97 (m, 8H), 6.93 (t,  $J = 7.8$  Hz, 1H), 6.83 (d,  $J = 8.0$  Hz, 2H), 6.69 (t,  $J = 7.8$  Hz, 1H), 5.39 (d,  $J = 2.0$  Hz, 1H), 4.46 (d,  $J = 11.0$  Hz, 1H), 4.17 (t,  $J = 10.9$  Hz, 1H), 2.43 (t,  $J = 11.0$  Hz, 1H), 4.05–3.95 (m, 1H), 2.43 (t,  $J = 14.0$  Hz, 1H), 2.24 (dd,  $J = 14.0, 3.5$  Hz, 1H). Product **2l** is a known compound, and its  $^1\text{H}$  NMR data are consistent with those reported in the literature.<sup>2a</sup>

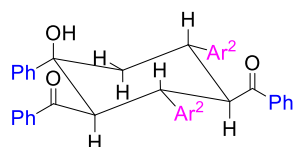

**2m**,  $\text{Ar}^1 = \text{Ph}$ ,  $\text{Ar}^2 = 2\text{-naphthyl}$

**Synthesis and spectral data of 2m:** By following the general procedure, the reaction of **1m** (52.4 mg, 0.20 mmol) with  $\text{KO}^t\text{Bu}$  (44.7 mg, 0.40 mmol) and  $\text{H}_2\text{O}$  (10.0  $\mu\text{L}$ , 0.60 mmol) afforded **2m** (19.1 mg, 45% yield) as a white solid.

$^1\text{H}$  NMR (400 MHz,  $\text{CDCl}_3$ )  $\delta$  7.73 (s, 1H), 7.67 (d,  $J = 7.9$  Hz, 1H), 7.64–7.58 (m,

4H), 7.53 (d,  $J = 8.1$  Hz, 1H), 7.47 (d,  $J = 8.4$  Hz, 2H), 7.42 (d,  $J = 7.9$  Hz, 1H), 7.38–7.30 (m, 4H), 7.13–7.01 (m, 8H), 7.12–7.01 (m, 2H), 6.96 (t,  $J = 7.4$  Hz, 1H), 6.91 (t,  $J = 7.7$  Hz, 2H), 6.81 (t,  $J = 7.6$  Hz, 2H), 5.47 (d,  $J = 1.8$  Hz, 1H), 4.67 (d,  $J = 11.3$  Hz, 1H), 4.49 (t,  $J = 10.9$  Hz, 1H), 4.41 (t,  $J = 11.2$  Hz, 1H), 4.34–4.25 (m, 1H), 2.66 (t,  $J = 14.0$  Hz, 1H), 2.35 (dd,  $J = 14.0, 3.4$  Hz, 1H). Product **2m** is a known compound, and its  $^1\text{H}$  NMR data are consistent with those reported in the literature.<sup>2a</sup>

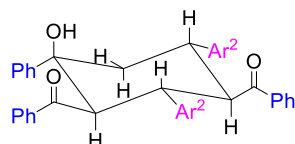

**2n**,  $\text{Ar}^1 = \text{Ph}$ ,  $\text{Ar}^2 = 2\text{-furyl}$

**Synthesis and spectral data of 2n:** By following the general procedure, the reaction of **1n** (39.8 mg, 0.20 mmol) with  $\text{KO}^t\text{Bu}$  (44.9 mg, 0.40 mmol) and  $\text{H}_2\text{O}$  (10.0  $\mu\text{L}$ , 0.60 mmol) afforded **2n** (21.7 mg, 63% yield) as a white solid.

$^1\text{H}$  NMR (500 MHz,  $\text{CDCl}_3$ )  $\delta$  7.58 (d,  $J = 7.7$  Hz, 2H), 7.51 (d,  $J = 7.7$  Hz, 2H), 7.45 (d,  $J = 7.7$  Hz, 2H), 7.39–7.30 (m, 2H), 7.23 (t,  $J = 7.7$  Hz, 2H), 7.18 (d,  $J = 7.2$  Hz, 2H), 7.16 (d,  $J = 7.2$  Hz, 2H), 7.09 (s, 1H), 7.05 (t,  $J = 7.3$  Hz, 1H), 6.85 (s, 1H), 6.00 (s, 1H), 5.92 (d,  $J = 2.8$  Hz, 1H), 5.74 (d,  $J = 2.8$  Hz, 1H), 5.67 (s, 1H), 5.37 (d,  $J = 2.0$  Hz, 1H), 4.62 (d,  $J = 11.7$  Hz, 1H), 4.48 (t,  $J = 11.3$  Hz, 1H), 4.19 (t,  $J = 11.5$  Hz, 1H), 4.09 (td,  $J = 12.1, 3.4$  Hz, 1H), 2.45 (t,  $J = 14.1$  Hz, 1H), 2.21 (dd,  $J = 14.1, 3.6$  Hz, 1H). Product **2n** is a known compound, and its  $^1\text{H}$  NMR data are consistent with those reported in the literature.<sup>2b</sup>

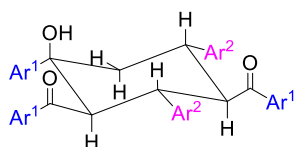

**2o**,  $\text{Ar}^1 = p\text{-CH}_3\text{C}_6\text{H}_4$ ,  $\text{Ar}^2 = p\text{-CH}_3\text{OC}_6\text{H}_4$

**Synthesis and spectral data of 2o:** By following the general procedure, the reaction of **1o** (50.1 mg, 0.20 mmol) with  $\text{KO}^t\text{Bu}$  (44.4 mg, 0.40 mmol) and  $\text{H}_2\text{O}$  (10.0  $\mu\text{L}$ , 0.60 mmol) afforded **2o** (32.3 mg, 76% yield) as a white solid.

$^1\text{H}$  NMR (500 MHz,  $\text{CDCl}_3$ )  $\delta$  7.40 (d,  $J = 8.2$  Hz, 2H), 7.24–7.18 (m, 4H), 7.16 (d,  $J = 8.7$  Hz, 2H), 7.06–6.99 (m, 2H), 6.97 (d,  $J = 8.1$  Hz, 2H), 6.88–6.82 (m, 4H), 6.62 (d,  $J = 8.7$  Hz, 2H), 6.35 (d,  $J = 8.9$  Hz, 2H), 5.42 (d,  $J = 2.2$  Hz, 1H), 4.43–4.35 (m, 1H), 4.13–4.05 (m, 2H), 4.02–3.92 (m, 1H), 3.63 (s, 3H), 3.47 (s, 3H), 2.39 (t,  $J = 13.2$  Hz, 1H), 2.203 (s, 3H), 2.196 (s, 3H), 2.16 (s, 3H), 2.18–2.14 (m, 1H). Product **2o** is a known compound, and its  $^1\text{H}$  NMR data are consistent with those reported in the literature.<sup>2c</sup>

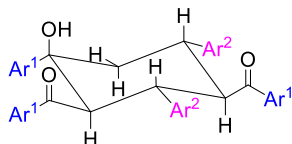

**2p**, Ar<sup>1</sup>=*p*-CH<sub>3</sub>C<sub>6</sub>H<sub>4</sub>, Ar<sup>2</sup>=*p*-CH<sub>3</sub>C<sub>6</sub>H<sub>4</sub>

**Synthesis and spectral data of 2p:** By following the general procedure, the reaction of **1p** (47.9 mg, 0.20 mmol) with KO<sup>t</sup>Bu (44.5 mg, 0.40 mmol) and H<sub>2</sub>O (10.0 μL, 0.60 mmol) afforded **2p** (30.3 mg, 75% yield) as a white solid.

<sup>1</sup>H NMR (400 MHz, CDCl<sub>3</sub>) δ 7.40 (d, *J* = 8.0 Hz, 2H), 7.20 (t, *J* = 7.5 Hz, 4H), 7.13 (d, *J* = 7.9 Hz, 2H), 7.06–6.98 (m, 2H), 6.95 (d, *J* = 8.0 Hz, 2H), 6.87 (d, *J* = 7.8 Hz, 2H), 6.83 (d, *J* = 7.8 Hz, 4H), 6.60 (d, *J* = 7.9 Hz, 2H), 5.43 (d, *J* = 1.7 Hz, 1H), 4.41 (d, *J* = 10.9 Hz, 1H), 4.19–4.08 (m, 2H), 4.04–3.92 (m, 1H), 2.42 (t, *J* = 13.8 Hz, 1H), 2.19 (s, 6H), 2.17–2.13 (m, 4H), 2.11 (s, 3H), 1.90 (s, 3H). Product **2p** is a known compound, and its <sup>1</sup>H NMR data are consistent with those reported in the literature.<sup>2b, 2c</sup>

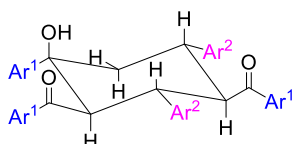

**2q**, Ar<sup>1</sup>=*p*-ClC<sub>6</sub>H<sub>4</sub>, Ar<sup>2</sup>=*p*-ClC<sub>6</sub>H<sub>4</sub>

**Synthesis and spectral data of 2q:** By following the general procedure, the reaction of **1q** (55.6 mg, 0.20 mmol) with KO<sup>t</sup>Bu (44.8 mg, 0.40 mmol) and H<sub>2</sub>O (10.0 μL, 0.60 mmol) afforded **2q** (29.7 mg, 63% yield) as a white solid.

<sup>1</sup>H NMR (500 MHz, CDCl<sub>3</sub>) δ 7.43 (d, *J* = 8.6 Hz, 2H), 7.22 (t, *J* = 8.9 Hz, 4H), 7.17 (t, *J* = 8.3 Hz, 4H), 7.13–6.98 (m, 8H), 6.87 (d, *J* = 8.7 Hz, 2H), 5.27 (d, *J* = 2.3 Hz, 1H), 4.33 (d, *J* = 11.4 Hz, 1H), 4.12 (t, *J* = 11.1 Hz, 1H), 4.05 (t, *J* = 10.8 Hz, 1H), 4.02–3.94 (m, 1H), 2.36 (t, *J* = 14.0 Hz, 1H), 2.18 (dd, *J* = 14.0, 3.4 Hz, 1H). Product **2q** is a known compound, and its <sup>1</sup>H NMR data are consistent with those reported in the literature.<sup>2a,2b</sup>

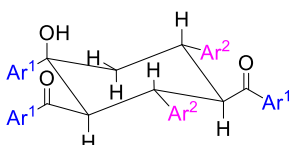

**2r**, Ar<sup>1</sup>=*p*-ClC<sub>6</sub>H<sub>4</sub>, Ar<sup>2</sup>=*p*-BrC<sub>6</sub>H<sub>4</sub>

**Synthesis and spectral data of 2r:** By following the general procedure, the reaction of **1r** (64.0 mg, 0.20 mmol) with KO<sup>t</sup>Bu (44.8 mg, 0.40 mmol) and H<sub>2</sub>O (10.0 μL, 0.60 mmol) afforded **2r** (38.1 mg, 72% yield) as a white solid.

<sup>1</sup>H NMR (400 MHz, CDCl<sub>3</sub>) δ 7.43 (d, *J* = 8.6 Hz, 2H), 7.30–7.15 (m, 8H), 7.14–7.06 (m, 6H), 7.06–6.93 (m, 4H), 5.26 (d, *J* = 2.0 Hz, 1H), 4.33 (d, *J* = 11.1 Hz, 1H), 4.20–3.91 (m, 3H), 4.11 (t, *J* = 10.8 Hz, 1H), 4.04 (t, *J* = 10.6 Hz, 1H), 4.01–3.92 (m, 1H), 2.35 (t, *J* = 14.0 Hz, 1H), 2.18 (dd, *J* = 14.0, 3.3 Hz, 1H). Product **2r** is a known compound, and its <sup>1</sup>H NMR data are consistent with those reported in the literature.<sup>2a,2c</sup>



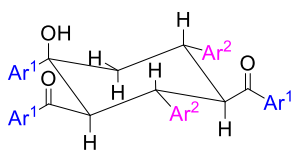

**2s**, Ar<sup>1</sup>=*p*-CH<sub>3</sub>C<sub>6</sub>H<sub>4</sub>, Ar<sup>2</sup>=*p*-BrC<sub>6</sub>H<sub>4</sub>

**Synthesis and spectral data of 2s:** By following the general procedure, the reaction of **1s** (60.1 mg, 0.20 mmol) with KO<sup>t</sup>Bu (44.9 mg, 0.40 mmol) and H<sub>2</sub>O (10.0 μL, 0.60 mmol) afforded **2s** (43.6 mg, 89% yield) as a white solid.

<sup>1</sup>H NMR (500 MHz, CDCl<sub>3</sub>) δ 7.40 (d, *J* = 8.2 Hz, 2H), 7.24–7.17 (m, 6H), 7.12 (d, *J* = 8.5 Hz, 2H), 6.98 (d, *J* = 8.0 Hz, 4H), 6.94 (d, *J* = 8.8 Hz, 2H), 6.91–6.85 (m, 4H), 5.41 (d, *J* = 2.4 Hz, 1H), 4.39 (d, *J* = 11.1 Hz, 1H), 4.17–4.05 (m, 2H), 4.03–3.95 (m, 1H), 2.39 (t, *J* = 13.9 Hz, 1H), 2.23 (s, 3H), 2.22 (s, 3H), 2.20–2.17 (m, 1H), 2.16 (s, 3H). Product **2s** is a known compound, and its <sup>1</sup>H NMR data are consistent with those reported in the literature.<sup>2c</sup>

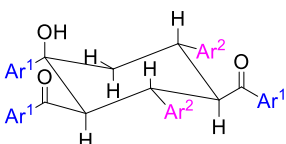

**2t**, Ar<sup>1</sup>=*p*-ClC<sub>6</sub>H<sub>4</sub>, Ar<sup>2</sup>=*p*-CH<sub>3</sub>C<sub>6</sub>H<sub>4</sub>

**Synthesis and spectral data of 2t:** By following the general procedure, the reaction of **1t** (51.5 mg, 0.20 mmol) with KO<sup>t</sup>Bu (44.8 mg, 0.40 mmol) and H<sub>2</sub>O (10.0 μL, 0.60 mmol) afforded **2t** (32.4 mg, 73% yield) as a white solid.

<sup>1</sup>H NMR (500 MHz, DMSO-*d*<sub>6</sub>) δ 7.59 (d, *J* = 8.6 Hz, 2H), 7.37 (t, *J* = 8.1 Hz, 4H), 7.23 (d, *J* = 8.5 Hz, 5H), 7.19 (d, *J* = 7.9 Hz, 2H), 7.14 (d, *J* = 8.7 Hz, 3H), 6.91 (d, *J* = 7.9 Hz, 2H), 6.68 (d, *J* = 8.0 Hz, 2H), 5.29 (s, 1H), 4.91 (d, *J* = 11.6 Hz, 1H), 4.65 (t, *J* = 11.1 Hz, 1H), 3.90 (t, *J* = 11.3 Hz, 1H), 3.68–3.59 (m, 1H), 2.83 (t, *J* = 13.0 Hz, 1H), 2.08 (s, 3H), 1.89 (s, 3H), 1.78 (dd, *J* = 13.4, 3.3 Hz, 1H). Product **2t** is a known compound, and its <sup>1</sup>H NMR data are consistent with those reported in the literature.<sup>2c</sup>

**Mechanochemical synthesis of product 2a':** A mixture of **1a** (41.8 mg, 0.20 mmol) with KO<sup>t</sup>Bu (22.7 mg, 0.20 mmol) and H<sub>2</sub>O (10.0 μL, 0.60 mmol) together with four stainless-steel balls (5-mm in diameter) was introduced into a stainless-steel jar (5 mL). The reaction vessel along with another identical vessel was closed and fixed on the vibration arms of a Retsch MM400 mixer mill and vibrated at a rate of 1800 rounds per minute (30 Hz) at room temperature for 1.5 h. After completion of the reaction, the resulting mixture was combined by washing with ethyl acetate. Then, the reaction mixture was filtered through a silica gel plug with ethyl acetate as the eluent and evaporated in a vacuum. The residue was separated by flash column chromatography on silica gel with ethyl acetate/petroleum ether (2:1) as the eluent to afford product **2a'** (20.7 mg, 58% yield) along with product **2a** (7.5 mg, 21% yield) as a white solid.

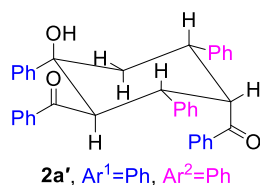

### Spectral data of **2a'**:

<sup>1</sup>H NMR (500 MHz, CDCl<sub>3</sub>) δ 7.79 (d, *J* = 8.2 Hz, 2H), 7.46 (d, *J* = 8.0 Hz, 2H), 7.31–7.22 (m, 3H), 7.20 (d, *J* = 7.9 Hz, 2H), 7.14 (t, *J* = 7.3 Hz, 1H), 7.12–7.02 (m, 9H), 7.00–6.92 (m, 3H), 6.85–6.75 (m, 3H), 5.72 (d, *J* = 12.0 Hz, 1H), 5.23 (d, *J* = 2.3 Hz, 1H), 4.37 (t, *J* = 4.3 Hz, 1H), 4.25–4.10 (m, 2H), 3.42 (t, *J* = 13.7 Hz, 1H), 2.05 (dd, *J* = 13.7, 3.0 Hz, 1H). Product **2a'** is a known compound, and its <sup>1</sup>H NMR data are consistent with those reported in the literature.<sup>3</sup>

### 3. Liquid-phase reaction of **1a** with KO<sup>t</sup>Bu and H<sub>2</sub>O

To a 25 mL Schlenk tube with a magnetic stir bar were added **1a** (47.1 mg, 0.20 mmol), KO<sup>t</sup>Bu (44.6 mg, 0.40 mmol) and H<sub>2</sub>O (10.0 μL, 0.60 mmol). Subsequently, diethyl ether (Et<sub>2</sub>O, 1.5 mL) was added by syringe. The resulting mixture was stirred at room temperature for 48 h. Then, the reaction mixture was filtered through a silica gel plug with ethyl acetate as the eluent and evaporated in vacuo. The residue was separated by flash column chromatography on silica gel with ethyl acetate/petroleum ether as the eluent to afford products **2a** (8.9 mg, 22% yield), **3a** (12.7 mg, 27% yield) and other unidentified byproducts.

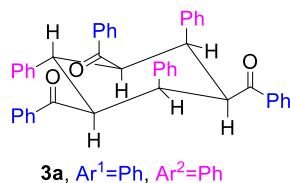

### Spectral data of **3a**:

<sup>1</sup>H NMR (400 MHz, CDCl<sub>3</sub>) δ 7.64 (d, *J* = 7.2 Hz, 4H), 7.47 (t, *J* = 7.4 Hz, 2H), 7.40–7.28 (m, 8H), 7.22–6.93 (m, 14H), 6.85 (t, *J* = 7.4 Hz, 2H), 4.77 (dd, *J* = 12.1, 5.3 Hz, 2H), 4.45 (t, *J* = 11.8 Hz, 2H), 4.19 (t, *J* = 11.5 Hz, 1H), 3.99 (t, *J* = 5.2 Hz, 1H). Product **3a** is a known compound, and its <sup>1</sup>H NMR data are consistent with those reported in the literature.<sup>2a</sup>

Other solvents, including toluene (1.5 mL), dimethyl sulfoxide (DMSO, 1.5 mL), tetrahydrofuran (THF, 1.5 mL) and acetonitrile (CH<sub>3</sub>CN, 1.5 mL), were also used to replace diethyl ether in the above procedure. However, all of them led to lower product yields.

## 4. Control experiments

### 4.1 Scavenging experiments with TEMPO

**Scavenging experiment with 3 equiv. of TEMPO:** A mixture of **1a** (41.8 mg, 0.20 mmol), KO<sup>t</sup>Bu (44.9 mg, 0.40 mmol), H<sub>2</sub>O (10.0 μL, 0.60 mmol) and 2,2,6,6-tetramethylpiperidinoxy (TEMPO, 94.2 mg, 0.60 mmol) together with four stainless-

steel balls (5-mm in diameter) was introduced into a stainless-steel jar (5 mL). The reaction vessel along with another identical vessel was closed and fixed on the vibration arms of a Retsch MM400 mixer mill and vibrated at a rate of 1800 rounds per minute (30 Hz) at room temperature for 1.5 h. After completion of the reaction, the resulting mixture was combined by washing with ethyl acetate. Then, the reaction mixture was filtered through a silica gel plug with ethyl acetate as the eluent and evaporated in vacuo. The residue was separated by flash column chromatography on silica gel with ethyl acetate/petroleum ether (2:1) as the eluent to afford product **2a** (16.9 mg, 47% yield) as a white solid.

**Scavenging experiments with 10 equiv. of TEMPO:** A mixture of **1a** (41.4 mg, 0.20 mmol), KO<sup>t</sup>Bu (44.4 mg, 0.40 mmol), H<sub>2</sub>O (10.0  $\mu$ L, 0.60 mmol) and TEMPO (312.0 mg, 2.0 mmol) together with four stainless-steel balls (5-mm in diameter) was introduced into a stainless-steel jar (5 mL). The reaction vessel along with another identical vessel was closed and fixed on the vibration arms of a Retsch MM400 mixer mill and vibrated at a rate of 1800 rounds per minute (30 Hz) at room temperature for 1.5 h. After completion of the reaction, the resulting mixture was combined by washing with ethyl acetate. Then, the reaction mixture was filtered through a silica gel plug with ethyl acetate as the eluent and evaporated in a vacuum. The residue was separated by flash column chromatography on silica gel with ethyl acetate/petroleum ether (2:1) as the eluent to afford product **2a** (14.7 mg, 41% yield) as a white solid.

#### 4.2 Mechanochemical reaction under an inert atmosphere

A mixture of **1a** (41.6 mg, 0.20 mmol), KO<sup>t</sup>Bu (44.9 mg, 0.40 mmol) and H<sub>2</sub>O (10.0  $\mu$ L, 0.60 mmol) together with four stainless-steel balls (5-mm in diameter) was introduced into a stainless-steel jar (5 mL). The jar was filled with nitrogen (N<sub>2</sub>) and tightened in a glovebox. The reaction vessel along with another identical vessel was closed and fixed on the vibration arms of a Retsch MM400 mixer mill and vibrated at a rate of 1800 rounds per minute (30 Hz) at room temperature for 1.5 h. After completion of the reaction, the resulting mixture was combined by washing with ethyl acetate. Then, the reaction mixture was filtered through a silica gel plug with ethyl acetate as the eluent and evaporated in a vacuum. The residue was separated by flash column chromatography on silica gel with ethyl acetate/petroleum ether (2:1) as the eluent to afford product **2a** (29.6 mg, 83% yield) as a white solid.

#### 4.3 HRMS detection of benzaldehyde from the reaction mixture

A mixture of **1a** (41.1 mg, 0.20 mmol), KO<sup>t</sup>Bu (44.6 mg, 0.40 mmol) and H<sub>2</sub>O (10.0  $\mu$ L, 0.60 mmol) together with four stainless-steel balls (5-mm in diameter) was introduced into a stainless-steel jar (5 mL). The reaction vessel along with another identical vessel was closed and fixed on the vibration arms of a Retsch MM400 mixer mill and vibrated at a rate of 1800 rounds per minute (30 Hz) at room temperature for 0.5 h. The benzaldehyde could be detected by high-resolution mass spectrometry (HRMS). HRMS (ESI) *m/z*: Calcd for C<sub>7</sub>H<sub>7</sub>O [M+H]<sup>+</sup> 107.0491; found 107.0487 (**Figure S1**).

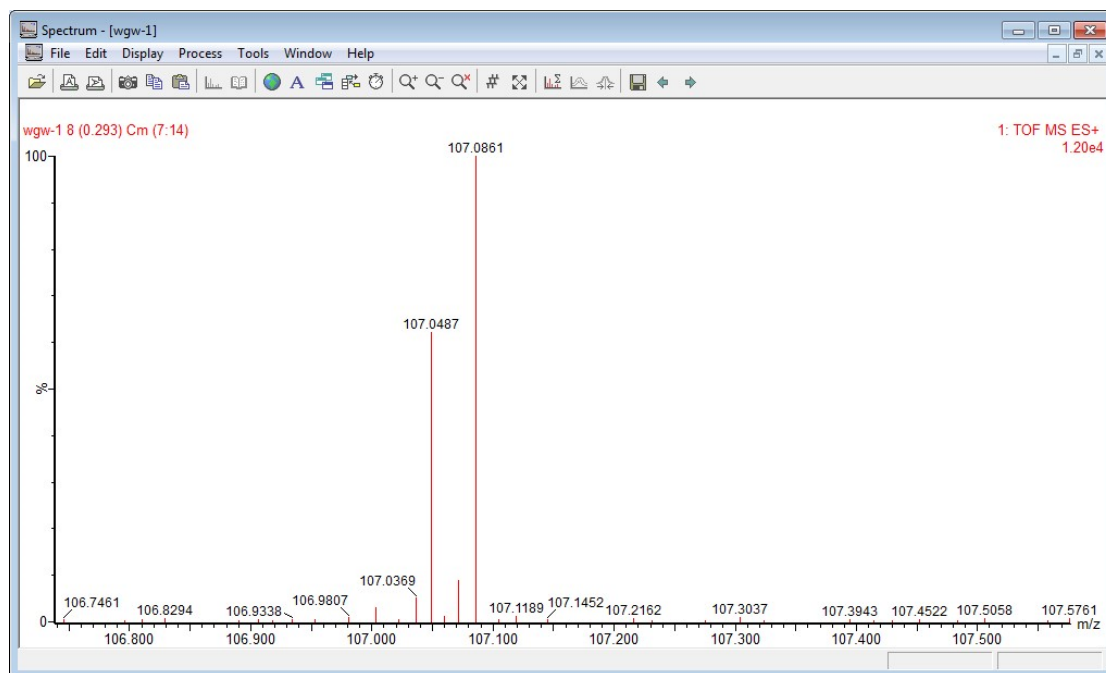

**Figure S1** HRMS detection of benzaldehyde

#### 4.4 Mechanosynthesis of products **2u** and **2v**

A mixture of chalcone **1a** (41.6 mg, 0.20 mmol), 4'-methoxyacetophenone (14.0  $\mu$ L, 0.10 mmol), KO<sup>t</sup>Bu (44.9 mg, 0.40 mmol) and H<sub>2</sub>O (10.0  $\mu$ L, 0.60 mmol) together with four stainless-steel balls (5-mm in diameter) was introduced into a stainless-steel jar (5 mL). The reaction vessel along with another identical vessel was closed and fixed on the vibration arms of a Retsch MM400 mixer mill and vibrated at a rate of 1800 rounds per minute (30 Hz) at room temperature for 1.5 h. After completion of the reaction, the resulting mixture was combined by washing with ethyl acetate. Then, the reaction mixture was filtered through a silica gel plug with ethyl acetate as the eluent and evaporated in a vacuum. The residue was separated by flash column chromatography on silica gel with ethyl acetate/petroleum ether as the eluent to afford product **2a** (13.2 mg, 37% yield) along with isomeric products **2u** and **2v** (24.1 mg, 41% yield) as inseparable white solids.

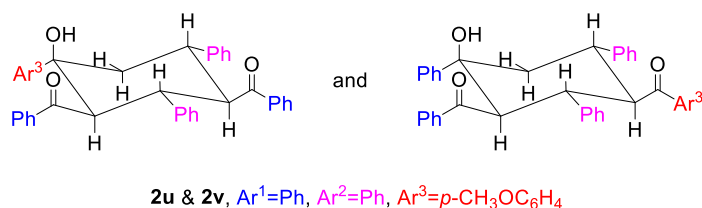

#### *Spectral data of 2u and 2v:*

<sup>1</sup>H NMR (400 MHz, CDCl<sub>3</sub>)  $\delta$  7.59–7.52 (m, 2H, **2u** & **2v**), 7.33 (d, *J* = 8.8 Hz, 2H, **2u** & **2v**), 7.30–7.12 (m, 9H, **2u** & **2v**), 7.11–7.06 (m, 2H, **2u** & **2v**), 7.05–7.00 (m, 3H, **2u** & **2v**), 7.00–6.94 (m, 1H, **2u** & **2v**), 6.87–6.81 (m, 2H, **2u** & **2v**), 6.75–6.68 (m, 1H, **2u** & **2v**), 6.51 (d, *J* = 8.7 Hz, 2H, **2u** & **2v**), 5.58 (d, *J* = 2.1 Hz, 0.5H, **2v**), 5.40 (d, *J* =

2.1 Hz, 0.5H, **2u**), 4.53–4.42 (m, 1H, **2u** & **2v**), 4.26–4.15 (m, 2H, **2u** & **2v**), 4.12–4.02 (m, 1H, **2u** & **2v**), 3.70–6.66 (m, 3H, **2u** & **2v**), 2.56–4.46 (m, 1H, **2u** & **2v**), 2.29–2.21 (m, 1H, **2u** & **2v**).

$^{13}\text{C}$  NMR (126 MHz,  $\text{CDCl}_3$ )  $\delta$  207.3, 204.7, 203.7, 201.4, 163.3, 162.5, 146.1, 146.0, 142.3, 142.2, 139.0, 138.9, 138.8, 138.1, 132.6, 132.3, 131.8, 131.7, 130.9, 130.4, 129.9, 128.34, 128.31, 128.2, 128.1, 128.05, 127.99, 127.9, 127.70, 127.66, 127.5, 127.4, 126.8, 126.7, 126.6, 124.82, 124.80, 112.9, 112.8, 75.4, 75.3, 56.83, 56.79, 55.7, 55.3, 55.2, 48.05, 48.01, 45.94, 45.90, 43.4, 43.3.

HRMS (ESI)  $m/z$ : Calcd for  $\text{C}_{39}\text{H}_{34}\text{O}_4\text{Na}$   $[\text{M}+\text{Na}]^+$  589.2349; found 589.2351.

**Scheme S1** Proposed reaction mechanism for the formation of **2u** and **2v**

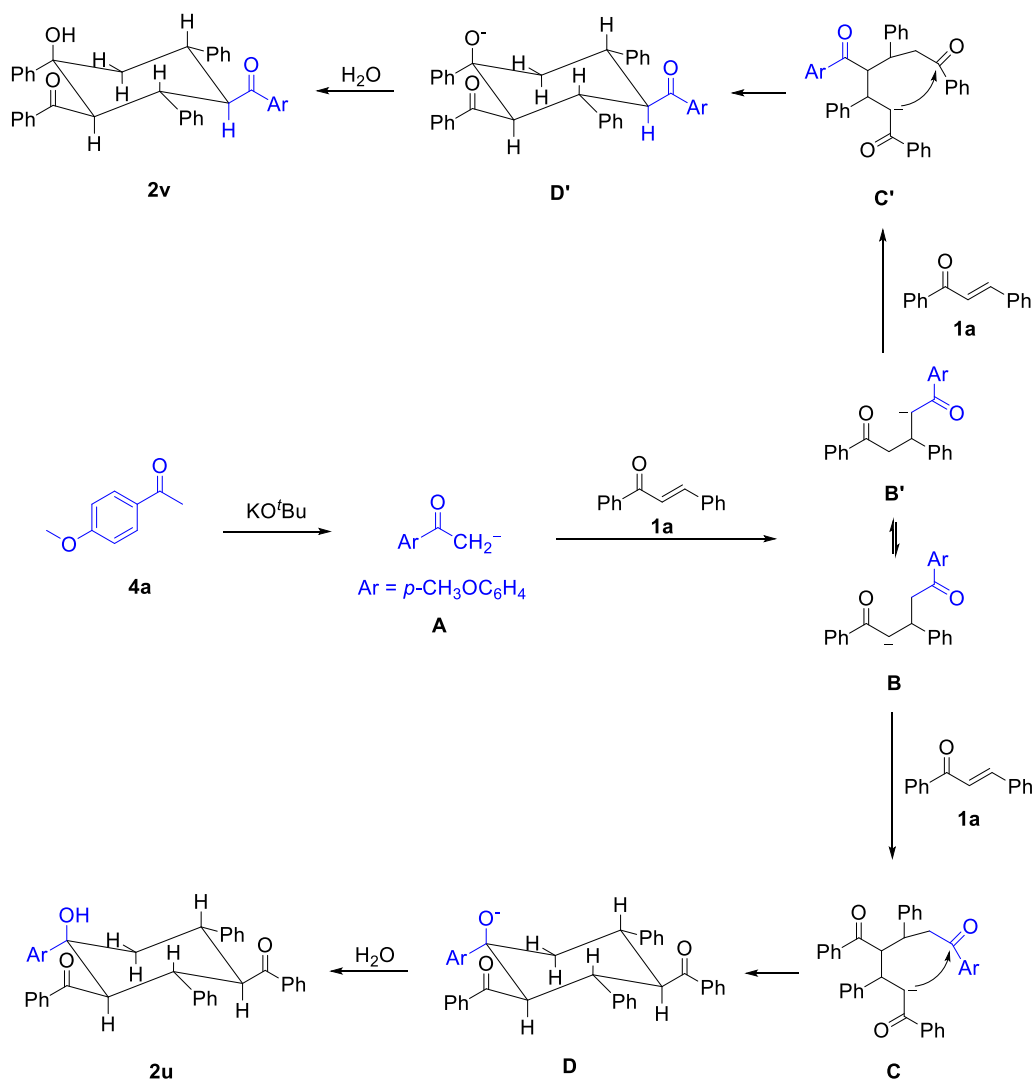

## 5. Mechanochemical synthesis of products **4a** and **4q**

A mixture of **2a** (**2q**, 0.10 mmol) and TfOH (0.30 mmol) together with four stainless-steel balls (5-mm in diameter) was introduced into a stainless-steel jar (5 mL). The reaction vessel along with another identical vessel was closed and fixed on the vibration arms of a Retsch MM400 mixer mill and vibrated at a rate of 1800 rounds per minute

(30 Hz) at room temperature for 1.5 h. After completion of the reaction, the resulting mixture was combined by washing with ethyl acetate. Then, the reaction mixture was filtered through a silica gel plug with ethyl acetate as the eluent and evaporated in a vacuum. The residue was separated by flash column chromatography on silica gel with ethyl acetate/petroleum ether as the eluent to afford product **4a** (**4q**).

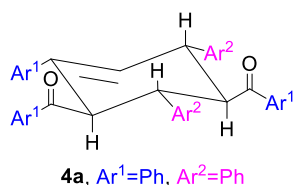

**Synthesis and spectral data of 4a:** By following the general procedure, the reaction of **2a** (53.9 mg, 0.10 mmol) with TfOH (26.5  $\mu$ L, 0.30 mmol) afforded **4a** (48.2 mg, 93% yield) as a white solid.

<sup>1</sup>H NMR (500 MHz, CDCl<sub>3</sub>)  $\delta$  7.49 (d,  $J$  = 7.2 Hz, 2H), 7.37–6.97 (m, 20H), 6.96–6.80 (m, 3H), 6.34 (s, 1H), 5.12 (d,  $J$  = 9.2 Hz, 1H), 4.35 (d,  $J$  = 8.6 Hz, 1H), 4.24 (t,  $J$  = 10.7 Hz, 1H), 3.95 (t,  $J$  = 10.8 Hz, 1H);

<sup>13</sup>C NMR (126 MHz, CDCl<sub>3</sub>)  $\delta$  204.3, 201.9, 143.0, 140.4, 139.7, 139.2, 138.1, 137.8, 132.5, 132.1, 131.8, 128.8, 128.39, 128.36, 128.3, 128.2, 128.1, 127.8, 127.4, 127.3, 127.14, 127.10, 126.5, 55.7, 55.3, 49.8, 48.1.

HRMS (ESI)  $m/z$ : Calcd for C<sub>38</sub>H<sub>30</sub>O<sub>2</sub>Na [M+Na]<sup>+</sup> 541.2138; found 541.2145.

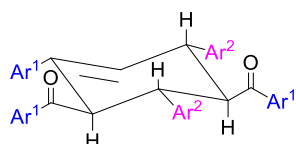

**Synthesis and spectral data of 4q:** By following the general procedure, the reaction of **2q** (70.1 mg, 0.10 mmol) with TfOH (26.5  $\mu$ L, 0.30 mmol) afforded **4q** (61.2 mg, 89% yield) as a white solid.

<sup>1</sup>H NMR (500 MHz, CDCl<sub>3</sub>)  $\delta$  7.45 (d,  $J$  = 8.7 Hz, 2H), 7.23–7.20 (m, 2H), 7.19–7.11 (m, 8H), 7.11–7.06 (m, 4H), 6.95 (s, 4H), 6.22 (t,  $J$  = 1.9 Hz, 1H), 4.98–4.90 (m, 1H), 4.31–4.23 (m, 1H), 4.07 (dd,  $J$  = 10.9, 10.5 Hz, 1H), 3.87 (dd,  $J$  = 11.2, 10.9 Hz, 1H). Product **4q** is a known compound, and its <sup>1</sup>H NMR data are consistent with those reported in the literature.<sup>4</sup>

## 6. X-ray data of product 2a

White flake crystals of **2a** were obtained by slow diffusion of **2a** in CHCl<sub>3</sub>/*n*-hexane solution at about 4 °C. Single-crystal X-ray diffraction data were collected on a diffractometer (SuperNova, Rigaku) equipped with a CCD area detector using graphite-monochromated CuK $\alpha$  radiation ( $\lambda$  = 1.54184 Å) in the scan range of 7.222° < 2 $\theta$  < 145.894°. The structure was solved with direct methods using SHELXT and refined

with full-matrix least-squares refinement using the SHELXL program within OLEX2. Crystallographic data have been deposited in the Cambridge Crystallographic Data Centre as deposition number CCDC 2277780.

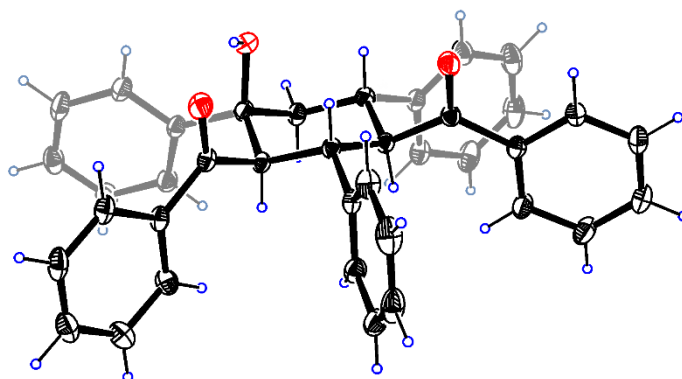

**Figure S2** ORTEP diagram for one enantiomer of racemic **2a** with 15% thermal ellipsoids.

**Table S1** Crystal data and structure refinement for **2a**.

|                                             |                                                                |
|---------------------------------------------|----------------------------------------------------------------|
| Identification code                         | 2277780                                                        |
| Crystal                                     | C <sub>38</sub> H <sub>32</sub> O <sub>3</sub>                 |
| Empirical formula                           | C <sub>38</sub> H <sub>32</sub> O <sub>3</sub>                 |
| Formula weight                              | 536.63                                                         |
| Temperature/K                               | 293(2)                                                         |
| Crystal system                              | triclinic                                                      |
| Space group                                 | P-1                                                            |
| a/Å                                         | 12.4366(4)                                                     |
| b/Å                                         | 12.5553(3)                                                     |
| c/Å                                         | 20.7421(7)                                                     |
| α/°                                         | 94.962(2)                                                      |
| β/°                                         | 97.385(3)                                                      |
| γ/°                                         | 101.068(2)                                                     |
| Volume/Å <sup>3</sup>                       | 3131.56(17)                                                    |
| Z                                           | 4                                                              |
| ρ <sub>calc</sub> g/cm <sup>3</sup>         | 1.138                                                          |
| μ/mm <sup>-1</sup>                          | 0.556                                                          |
| F(000)                                      | 1136.0                                                         |
| Crystal size/mm <sup>3</sup>                | 0.2 × 0.18 × 0.05                                              |
| Radiation                                   | CuKα (λ = 1.54184)                                             |
| 2θ range for data collection/°              | 7.222 to 145.894                                               |
| Index ranges                                | -15 ≤ h ≤ 13, -11 ≤ k ≤ 15, -25 ≤ l ≤ 25                       |
| Reflections collected                       | 22430                                                          |
| Independent reflections                     | 12132 [R <sub>int</sub> = 0.0287, R <sub>sigma</sub> = 0.0366] |
| Data/restraints/parameters                  | 12132/0/742                                                    |
| Goodness-of-fit on F <sup>2</sup>           | 1.040                                                          |
| Final R indexes [I ≥ 2σ (I)]                | R <sub>1</sub> = 0.0518, wR <sub>2</sub> = 0.1492              |
| Final R indexes [all data]                  | R <sub>1</sub> = 0.0660, wR <sub>2</sub> = 0.1626              |
| Largest diff. peak/hole / e Å <sup>-3</sup> | 0.63/-0.26                                                     |

## 7. References

- [1] Y. Li, H. Xu, M. Xing, F. Huang, J. Jia and J. Gao, *Org. Lett.*, 2015, **17**, 3690–3693.
- [2] (a) Y. Zhang, X. Wu, L. Hao, Z.-R. Wong, S. J. L. Lauw, S. Yang, R. D. Webster and Y. R. Chi, *Org. Chem. Front.*, 2017, **4**, 467–471; (b) J. Zheng, S. Fan, S. Liu, G. Shen, W.-D. Si, X. Dong, X. Huang, Y. Zhang, Q. Yao, Z. Li and D. Sun, *Inorg. Chem. Front.*, 2022, **9**, 5607–5615; (c) H. Gezezen and M. Ceylan, *Synth. Commun.*, 2015, **45**, 2344–2349.
- [3] (a) Z. Shan, X. Hu, L. Hu and X. Peng, *Helv. Chim. Acta*, 2009, **92**, 1102–1111.
- [4] S. Mukhtar, M. A. Alsharif, M. I. Alahmdi and H. Parveen, *Asian J. Chem.*, 2018, **30**, 1102–1108.



## 8. NMR spectra of products 2a–2v, 2a', 3a, 4a and 4q

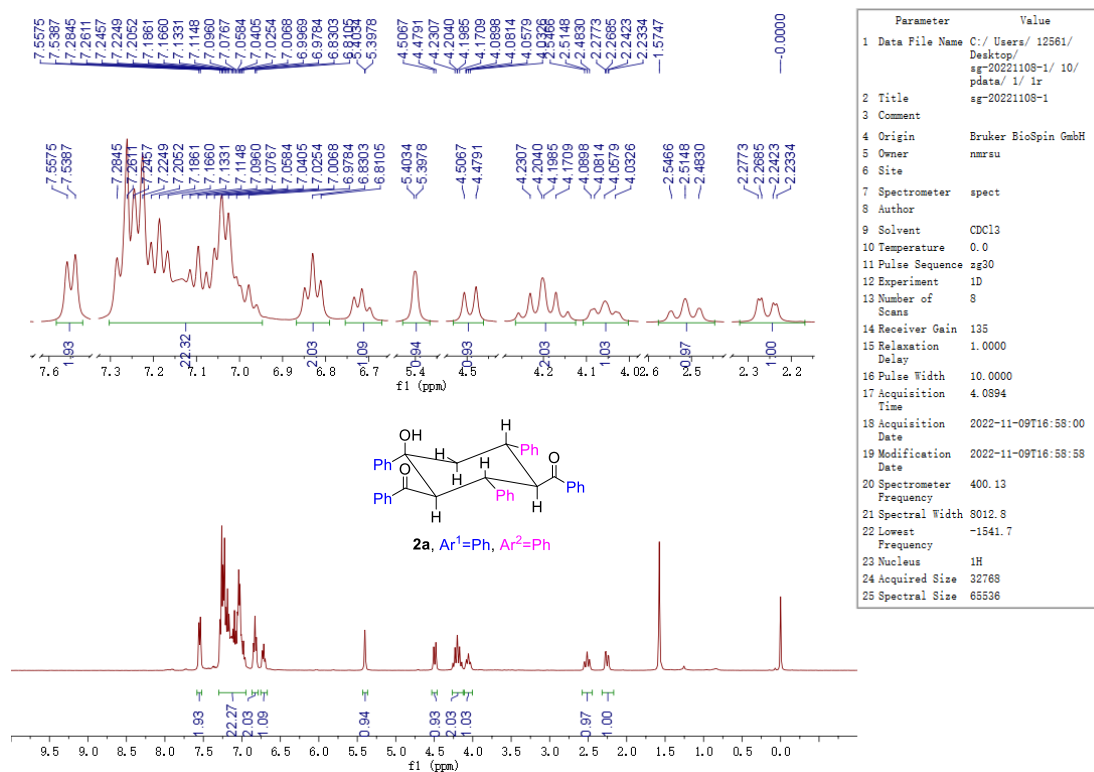

**Figure S3**  $^1\text{H}$  NMR (400 MHz,  $\text{CDCl}_3$ ) of compound **2a**

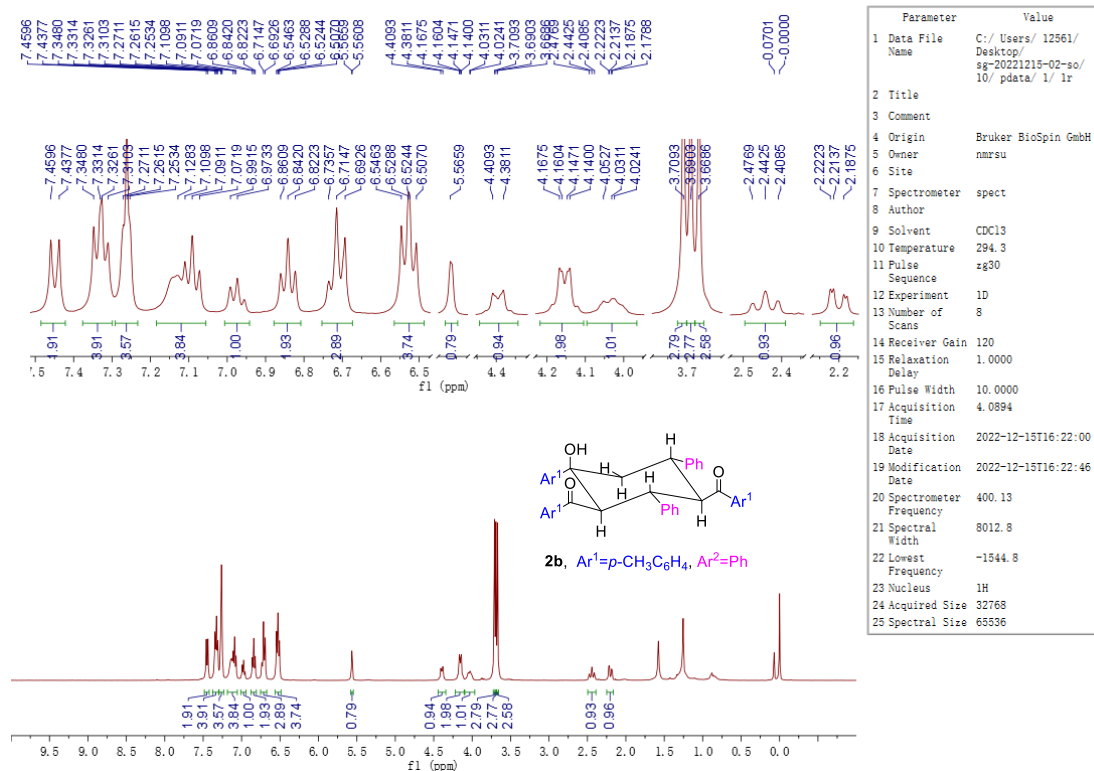

**Figure S4**  $^1\text{H}$  NMR (400 MHz,  $\text{CDCl}_3$ ) of compound **2b**

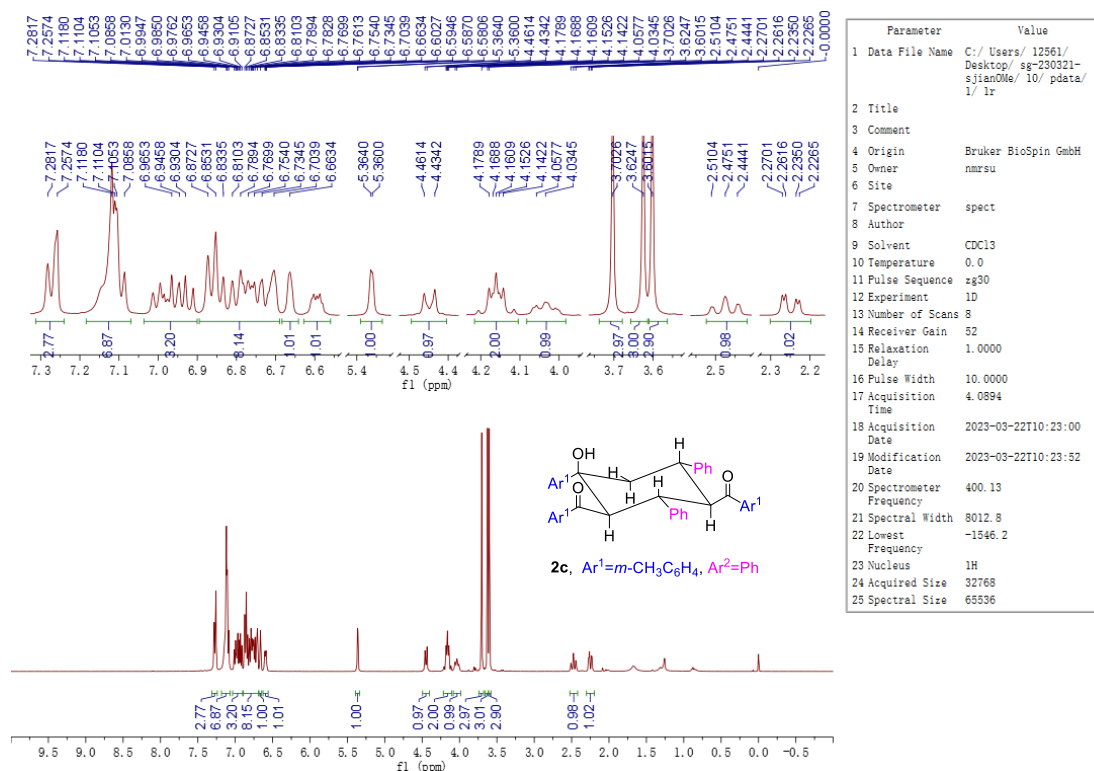

Figure S5  $^1\text{H}$  NMR (400 MHz,  $\text{CDCl}_3$ ) of compound **2c**

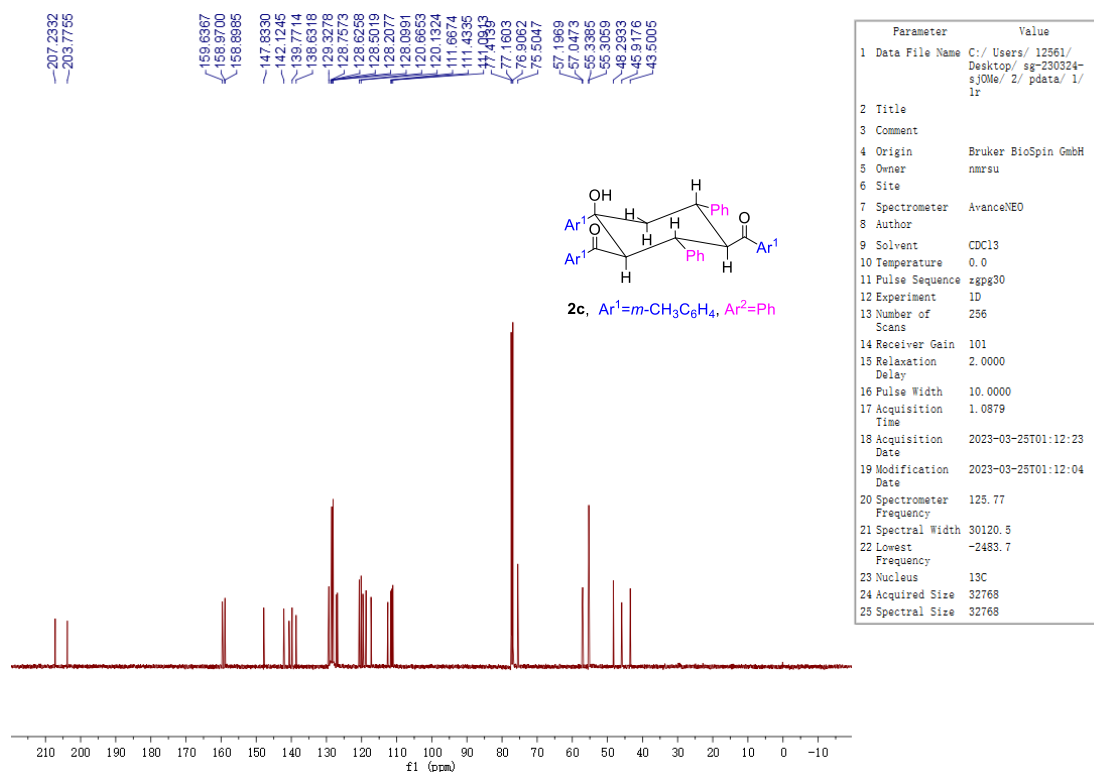

Figure S6  $^{13}\text{C}$  NMR (126 MHz,  $\text{CDCl}_3$ ) of compound **2c**

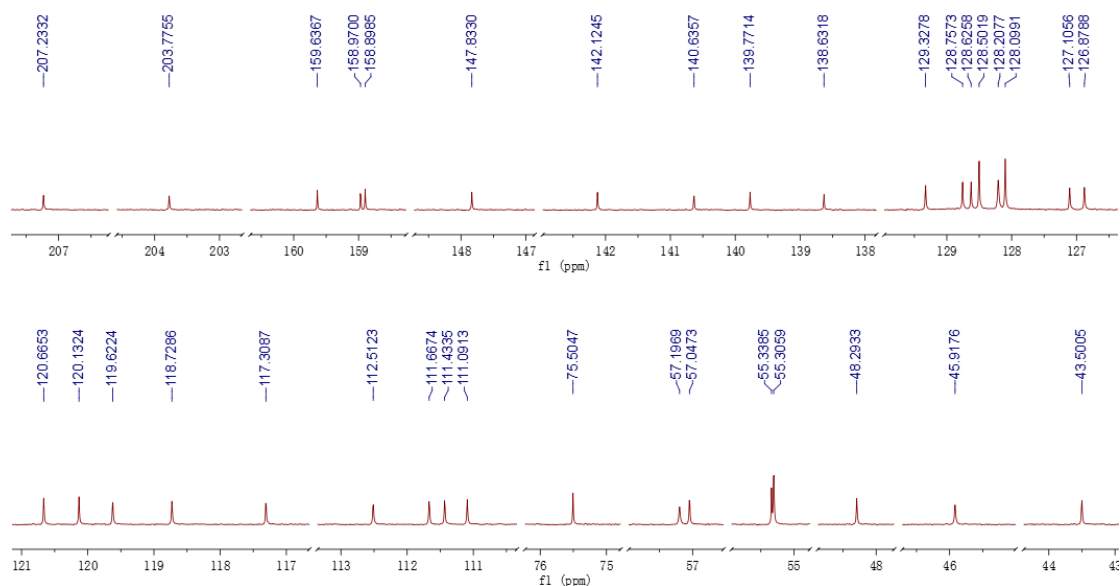

Figure S7 Expanded  $^{13}\text{C}$  NMR (126 MHz,  $\text{CDCl}_3$ ) of compound **2c**

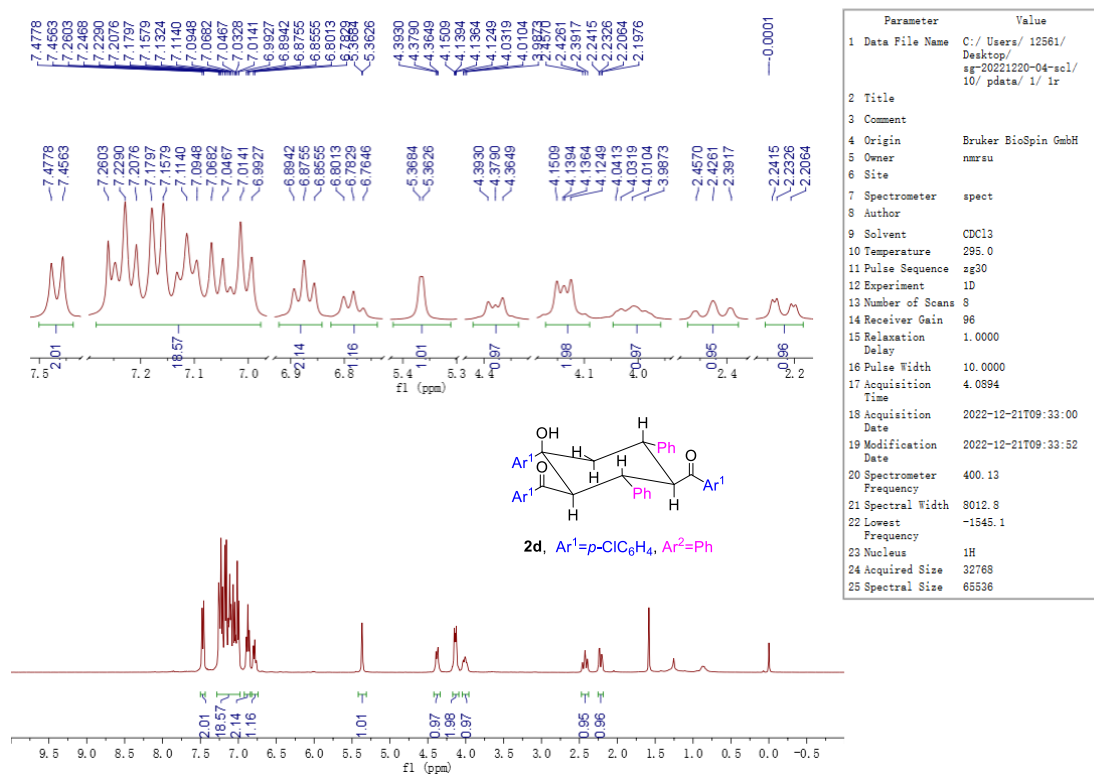

Figure S8  $^1\text{H}$  NMR (400 MHz,  $\text{CDCl}_3$ ) of compound **2d**

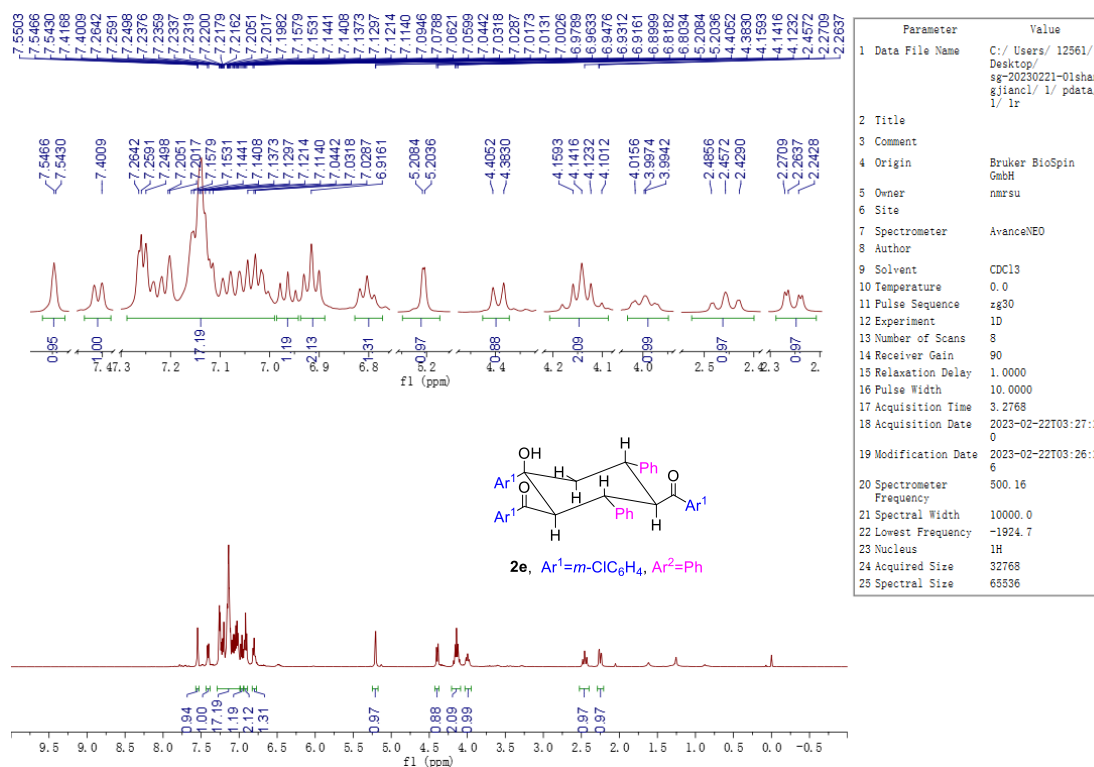

Figure S9 <sup>1</sup>H NMR (500 MHz, CDCl<sub>3</sub>) of compound **2e**

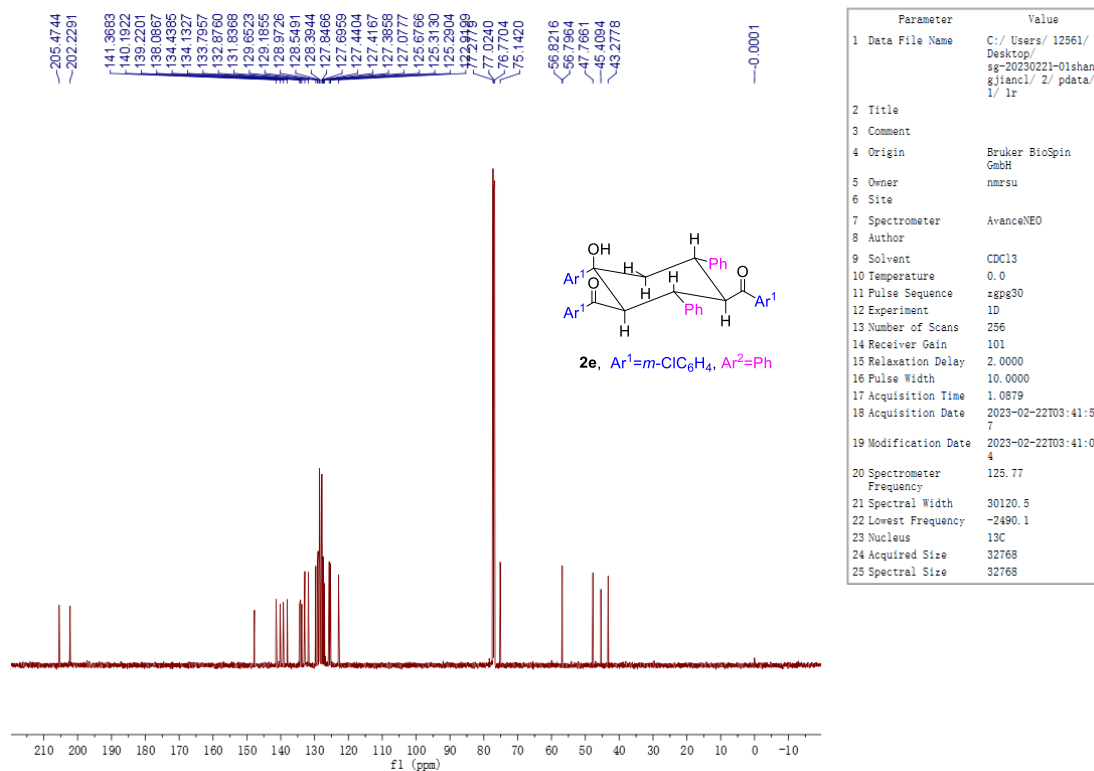

Figure S10 <sup>13</sup>C NMR (126 MHz, CDCl<sub>3</sub>) of compound **2e**

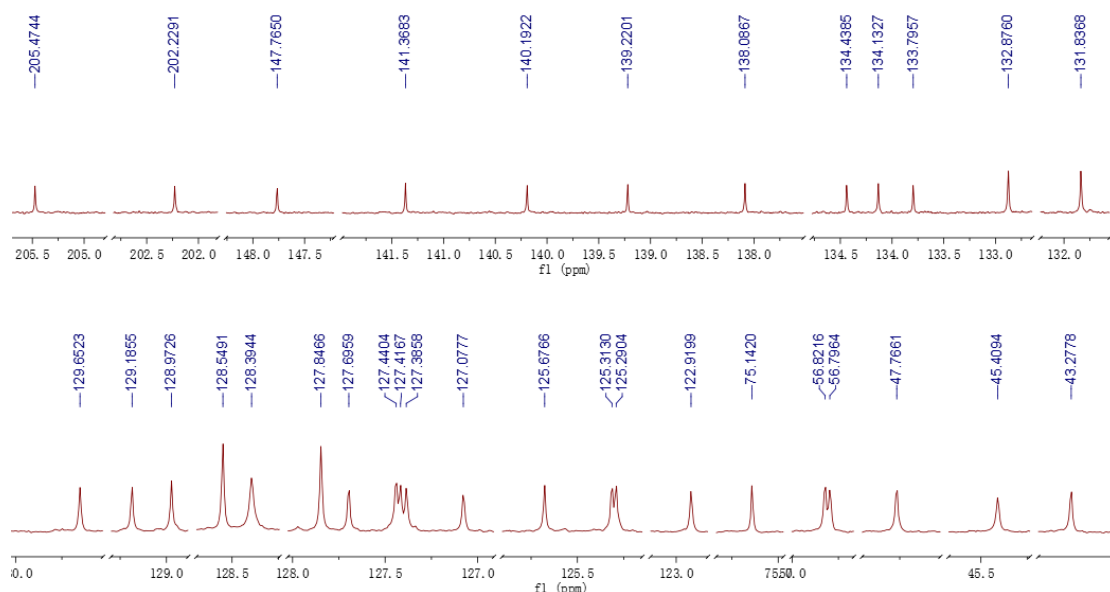

Figure S11 Expanded  $^{13}\text{C}$  NMR (126 MHz,  $\text{CDCl}_3$ ) of compound **2e**

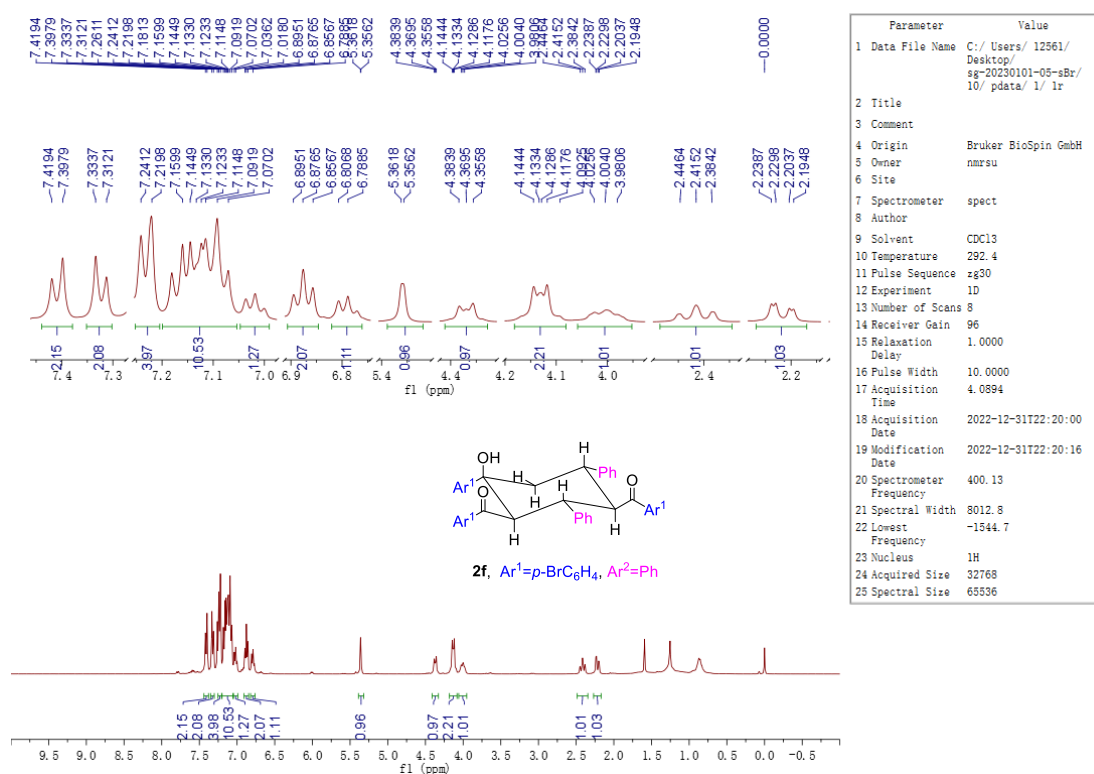

Figure S12  $^1\text{H}$  NMR (400 MHz,  $\text{CDCl}_3$ ) of compound **2f**

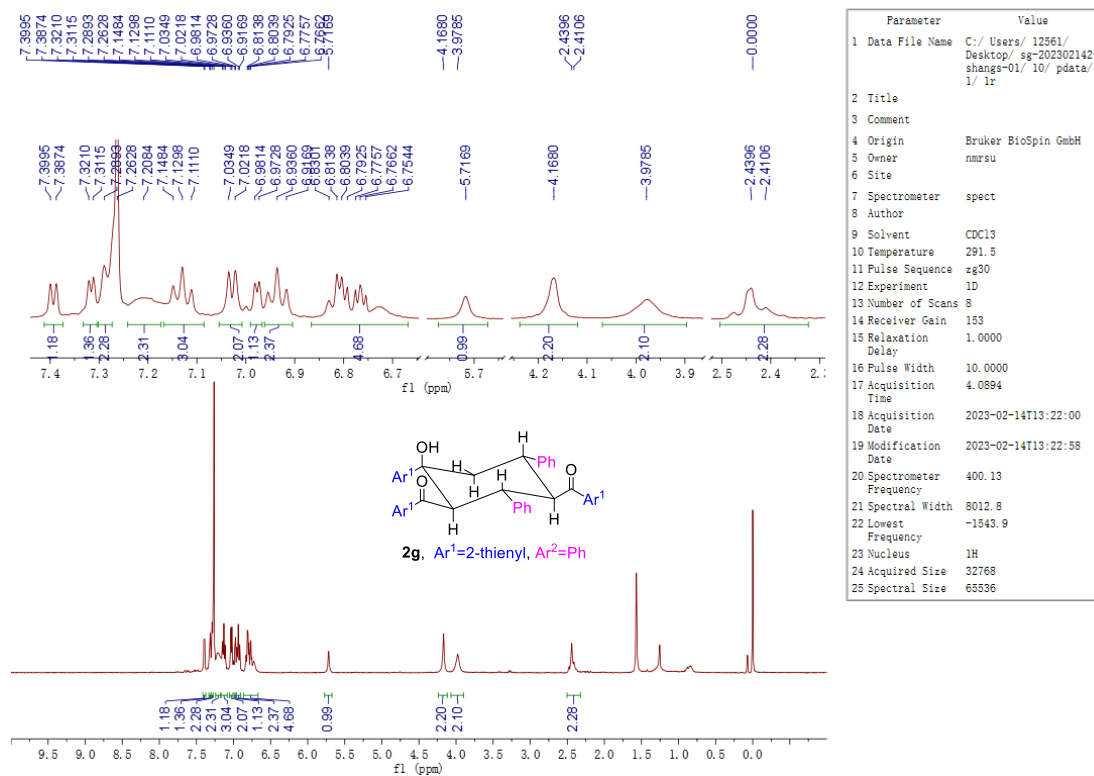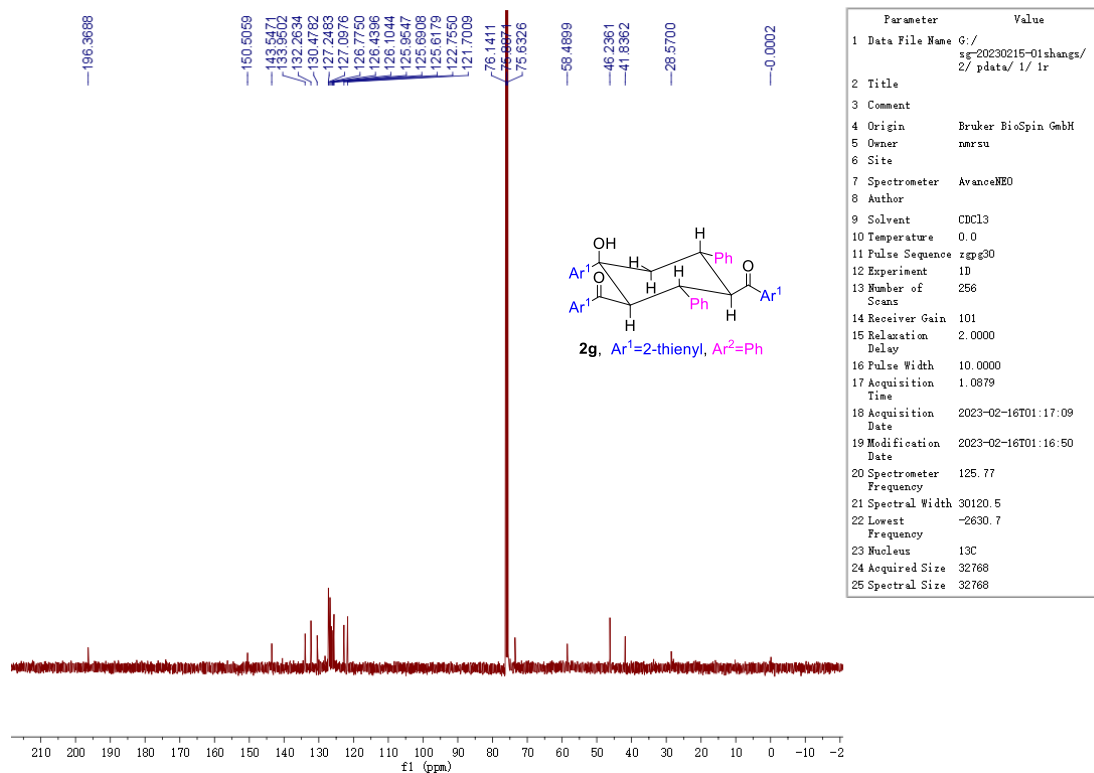

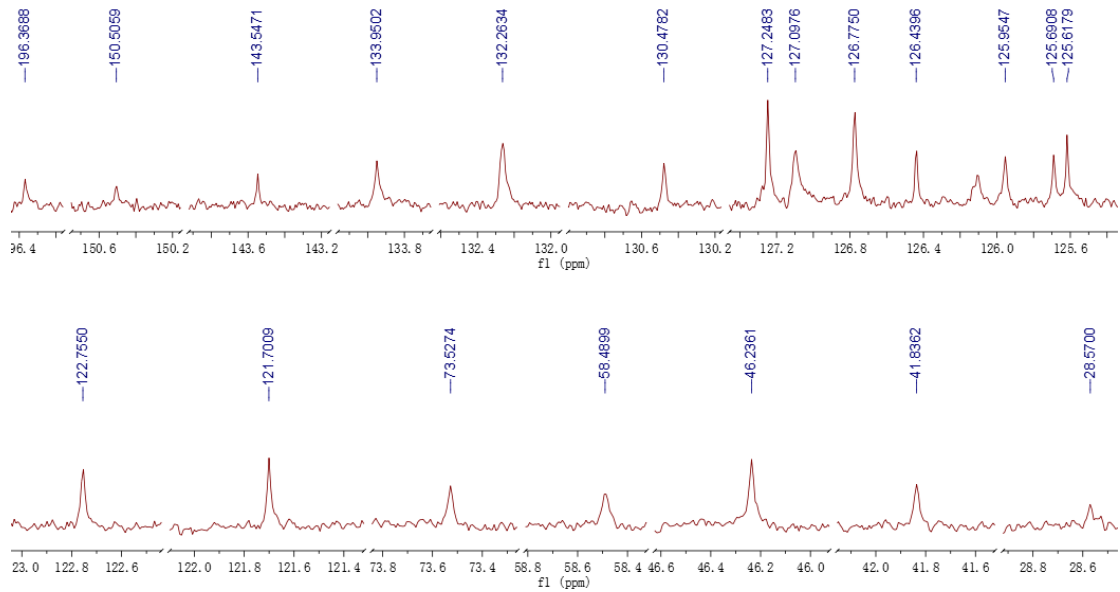

Figure S15 Expanded  $^{13}\text{C}$  NMR (126 MHz,  $\text{CDCl}_3$ ) of compound **2g**

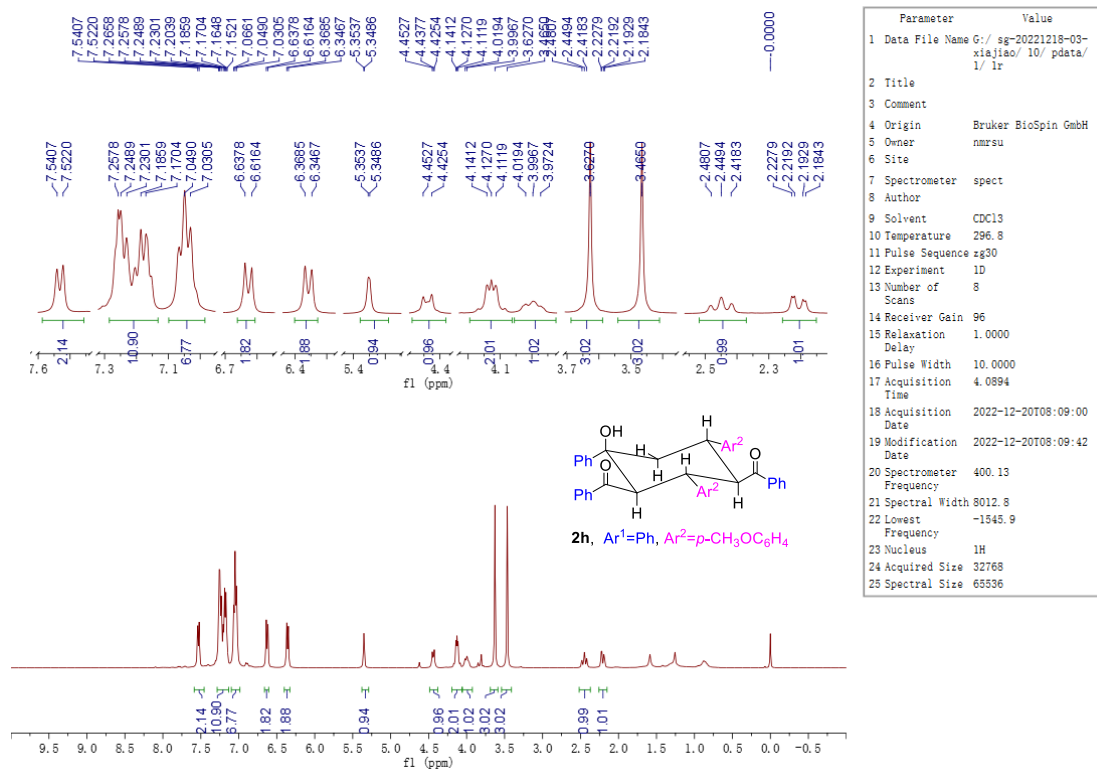

Figure S16  $^1\text{H}$  NMR (400 MHz,  $\text{CDCl}_3$ ) of compound **2h**

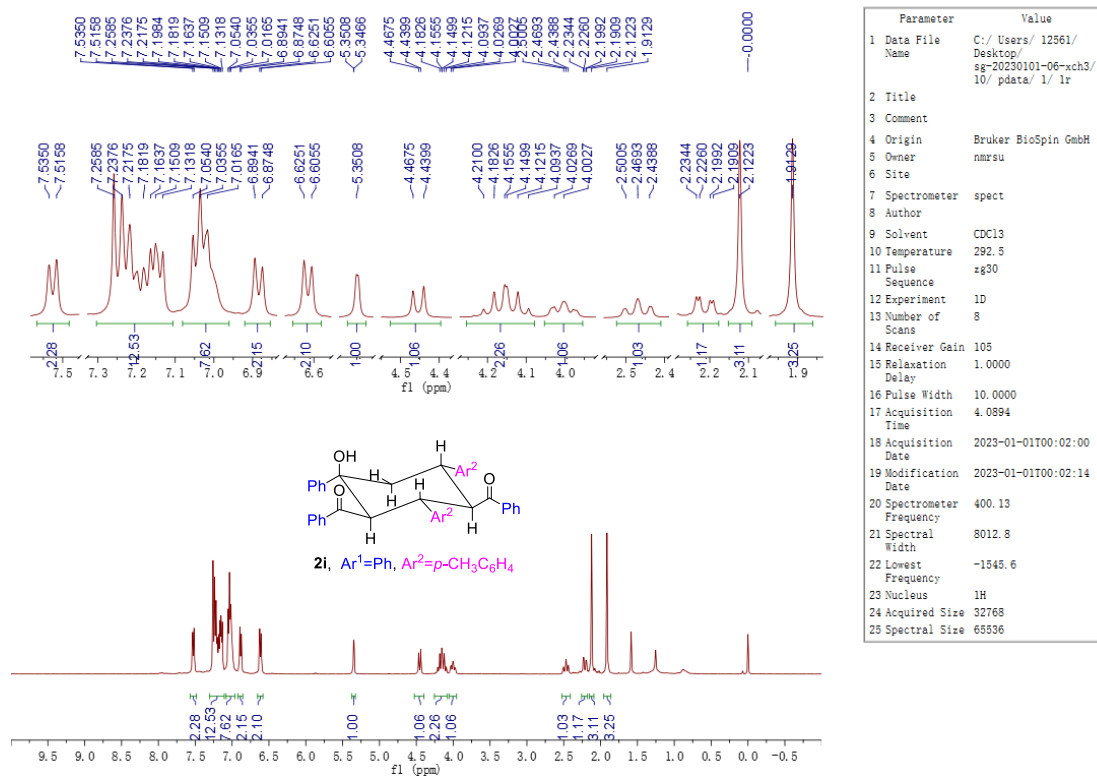

**Figure S17** <sup>1</sup>H NMR (400 MHz, CDCl<sub>3</sub>) of compound **2i**

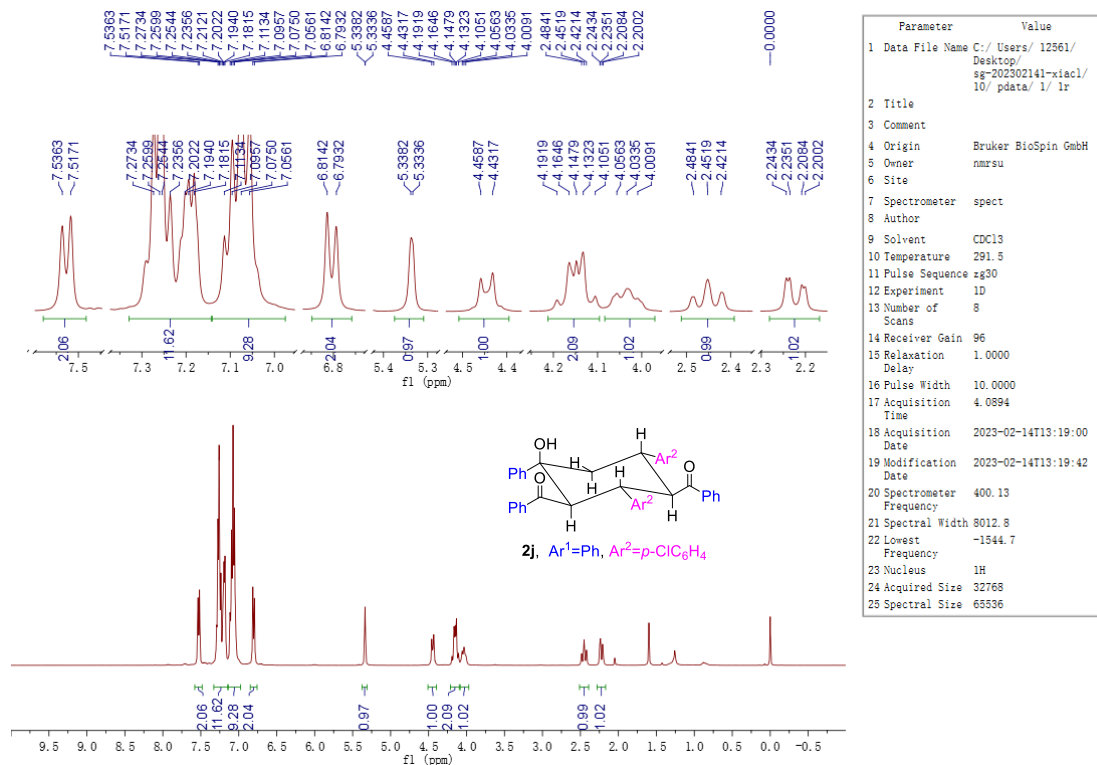

**Figure S18** <sup>1</sup>H NMR (400 MHz, CDCl<sub>3</sub>) of compound **2j**



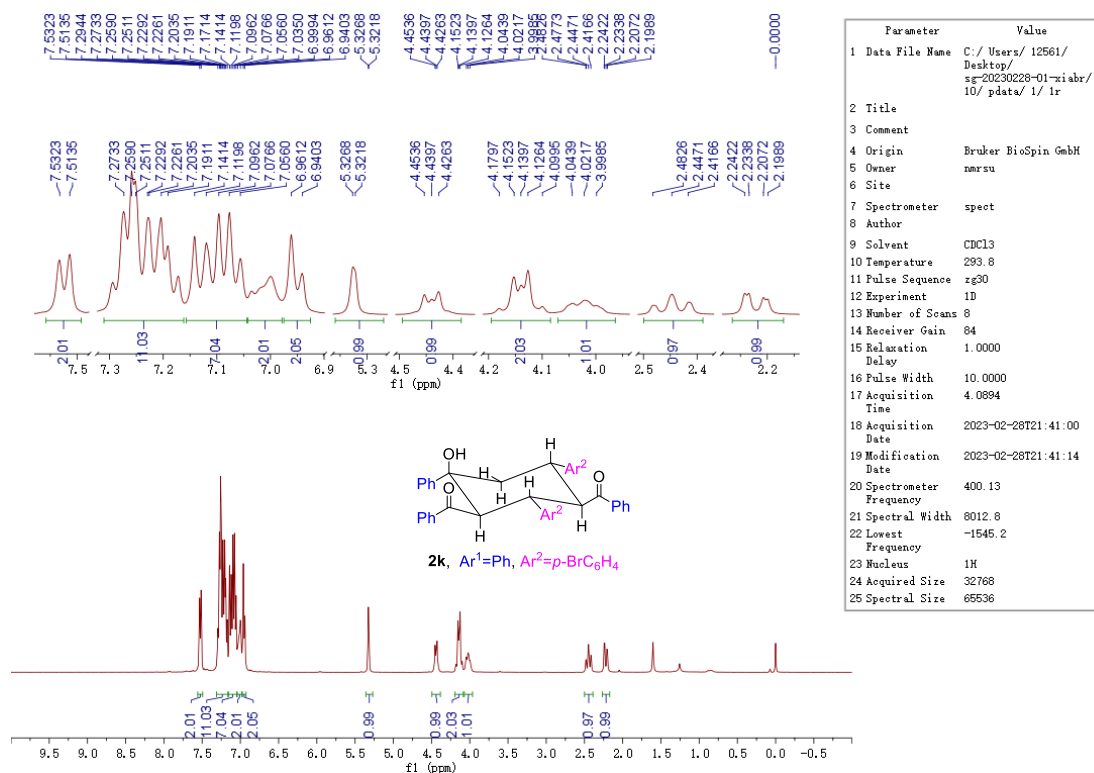

Figure S19 <sup>1</sup>H NMR (400 MHz, CDCl<sub>3</sub>) of compound **2k**

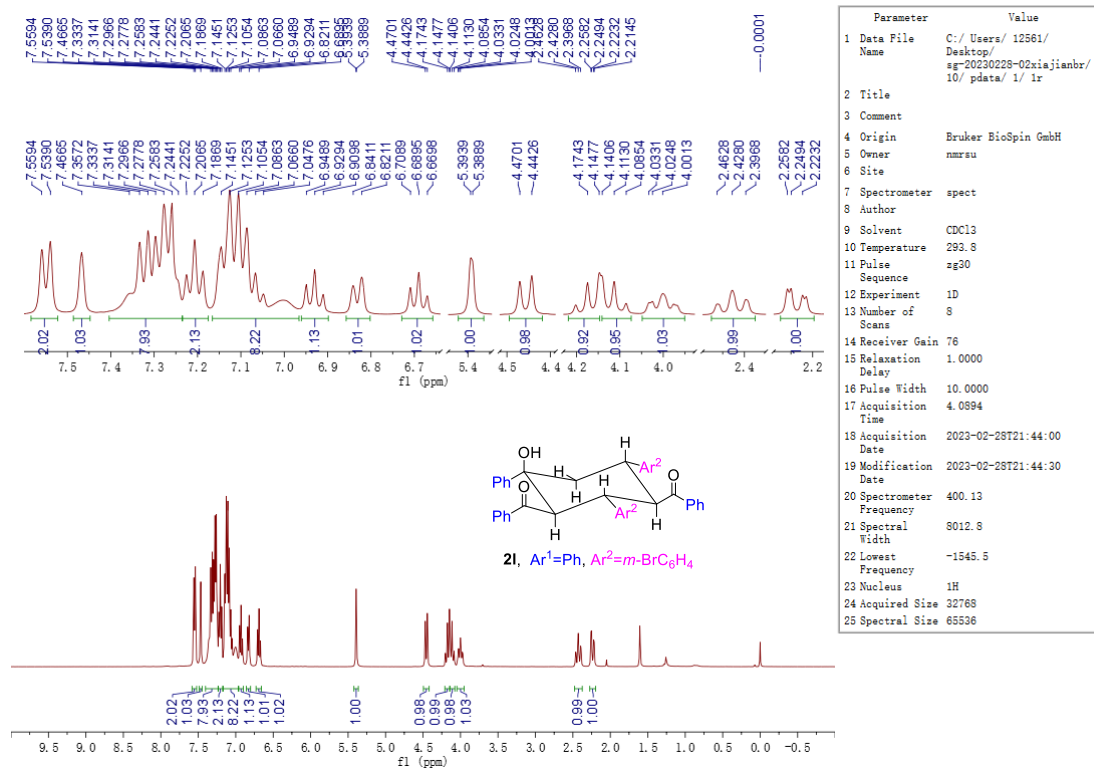

Figure S20 <sup>1</sup>H NMR (400 MHz, CDCl<sub>3</sub>) of compound **2l**

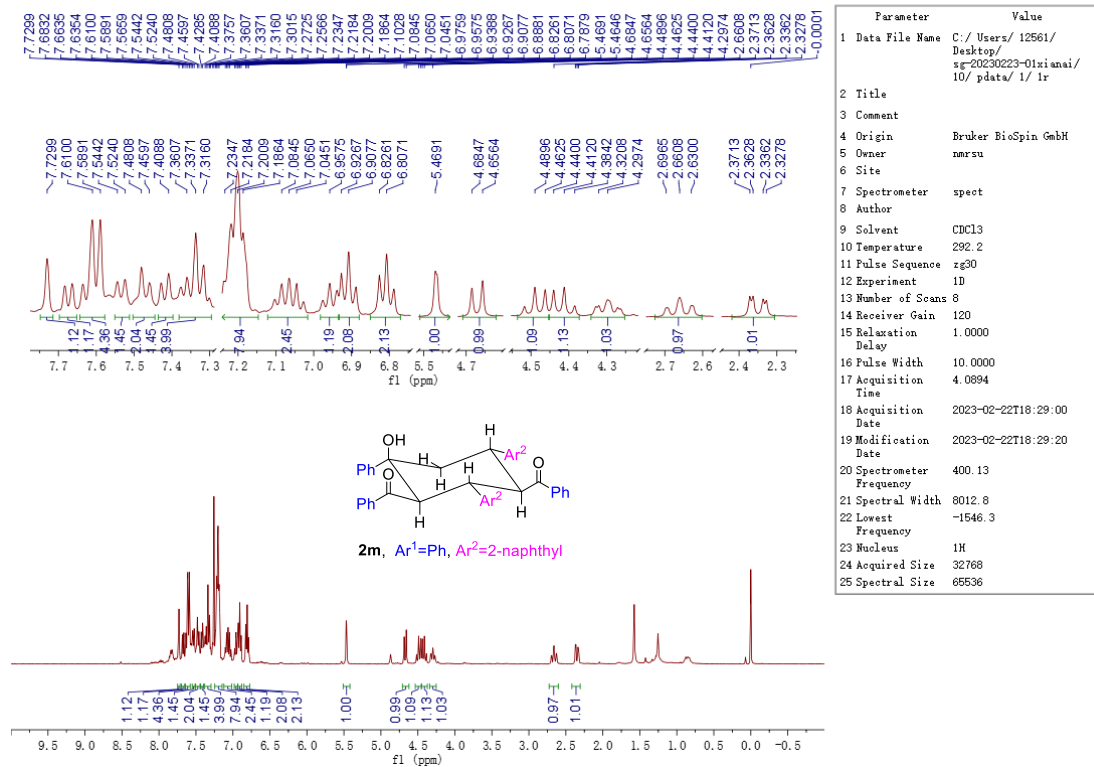

Figure S21 <sup>1</sup>H NMR (400 MHz, CDCl<sub>3</sub>) of compound **2m**

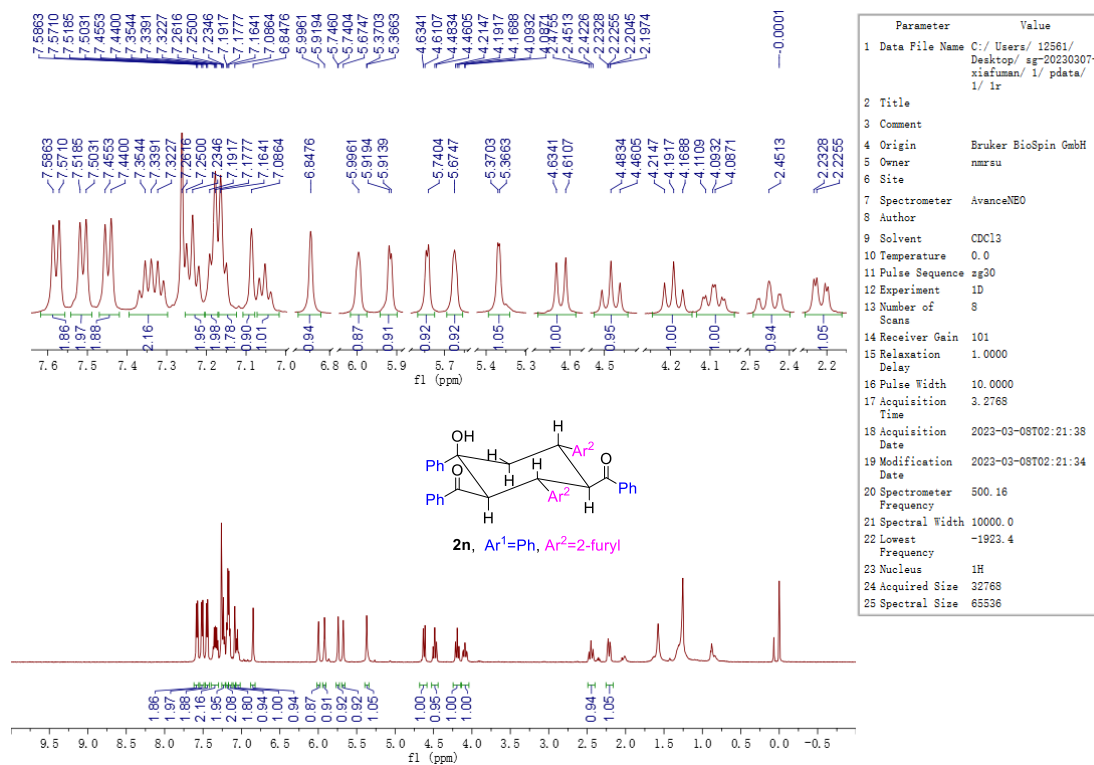

Figure S22 <sup>1</sup>H NMR (500 MHz, CDCl<sub>3</sub>) of compound **2n**

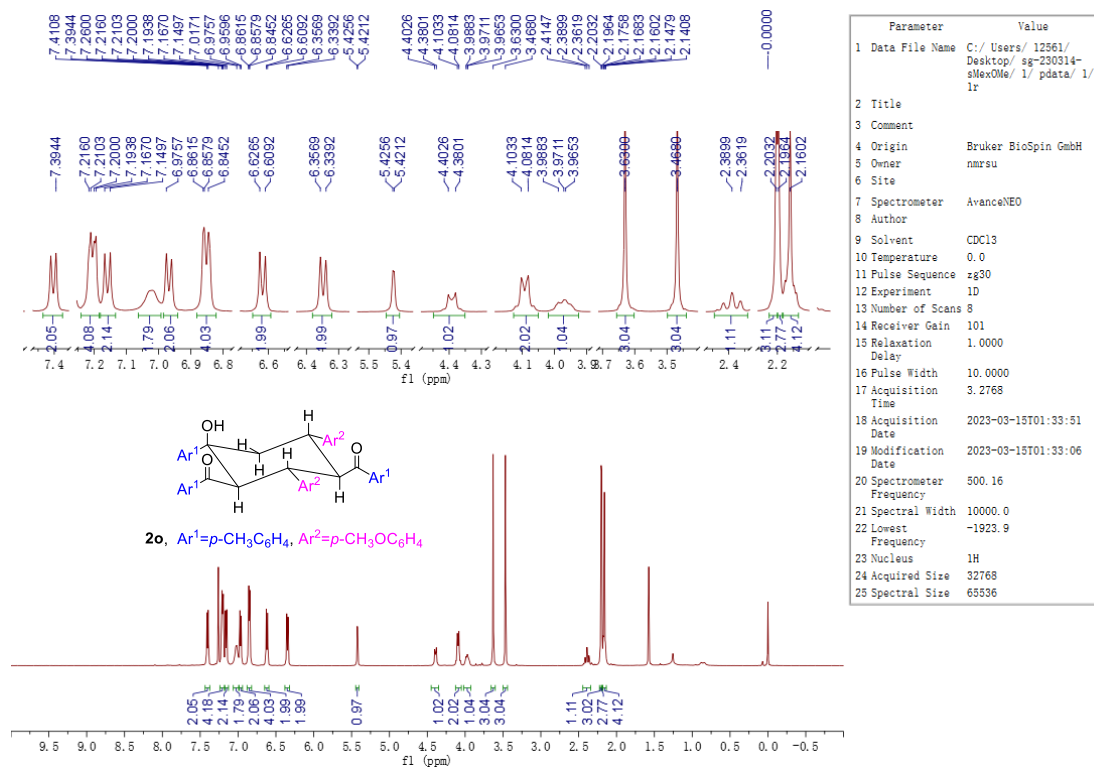

**Figure S23** <sup>1</sup>H NMR (500 MHz, CDCl<sub>3</sub>) of compound **2o**

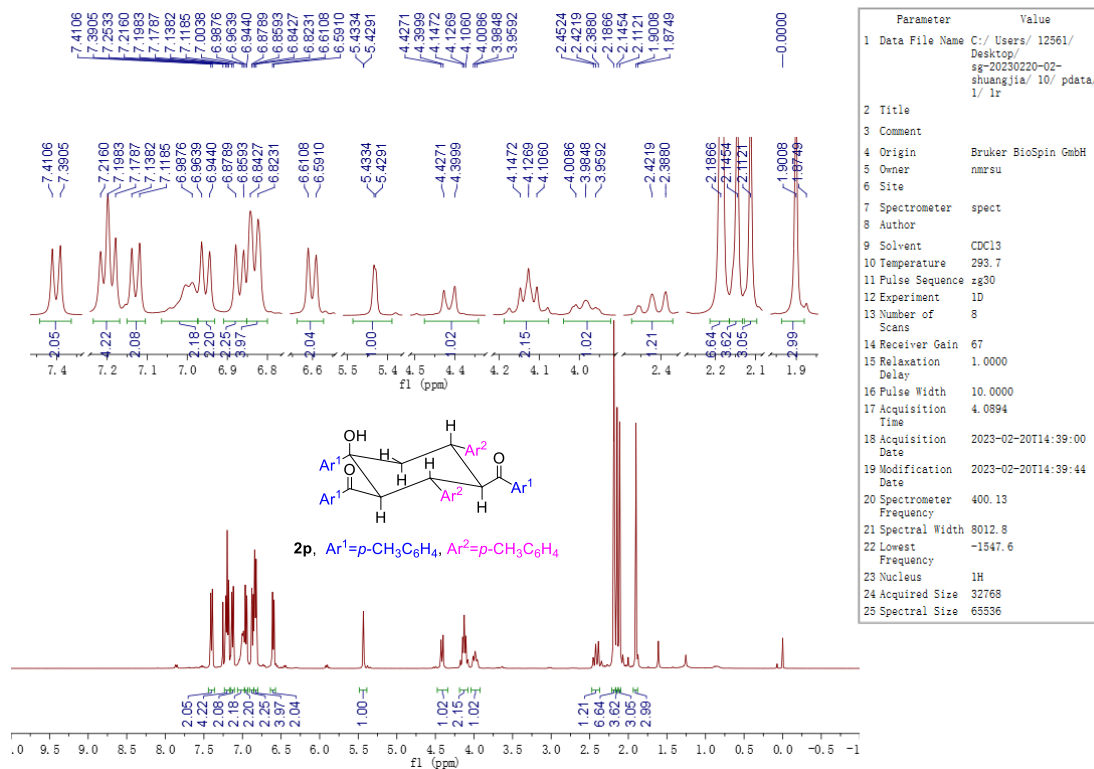

**Figure S24** <sup>1</sup>H NMR (400 MHz, CDCl<sub>3</sub>) of compound **2p**

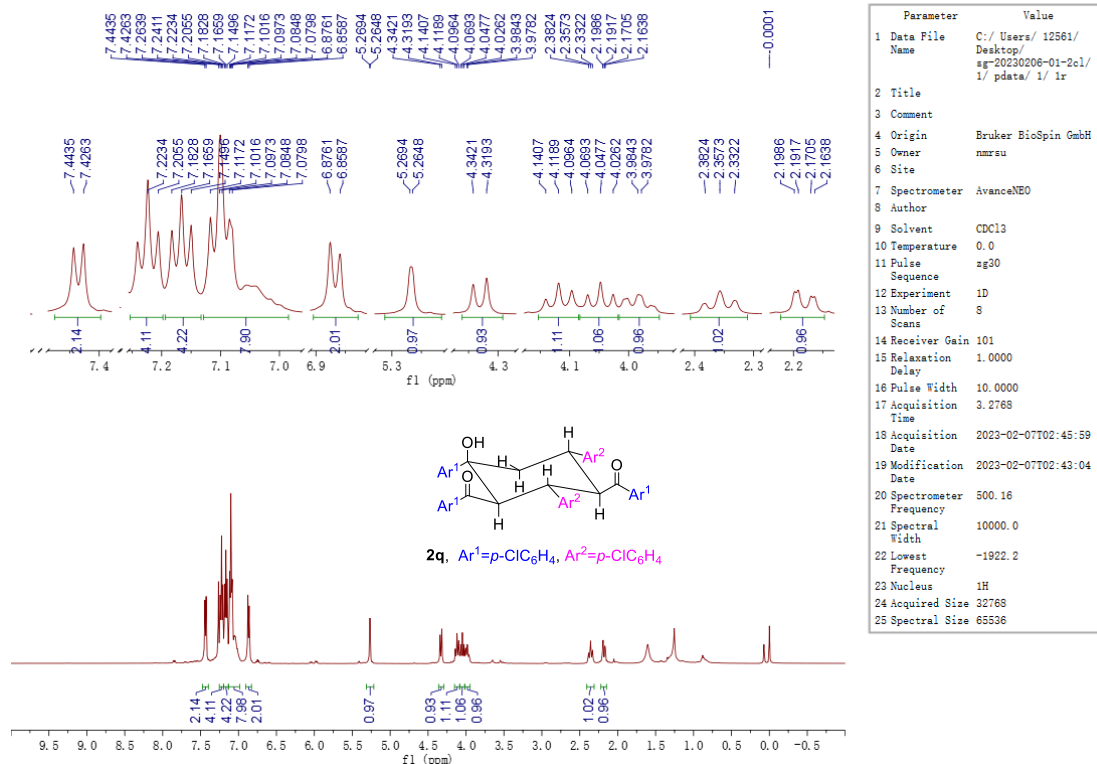

**Figure S25** <sup>1</sup>H NMR (500 MHz, CDCl<sub>3</sub>) of compound **2q**

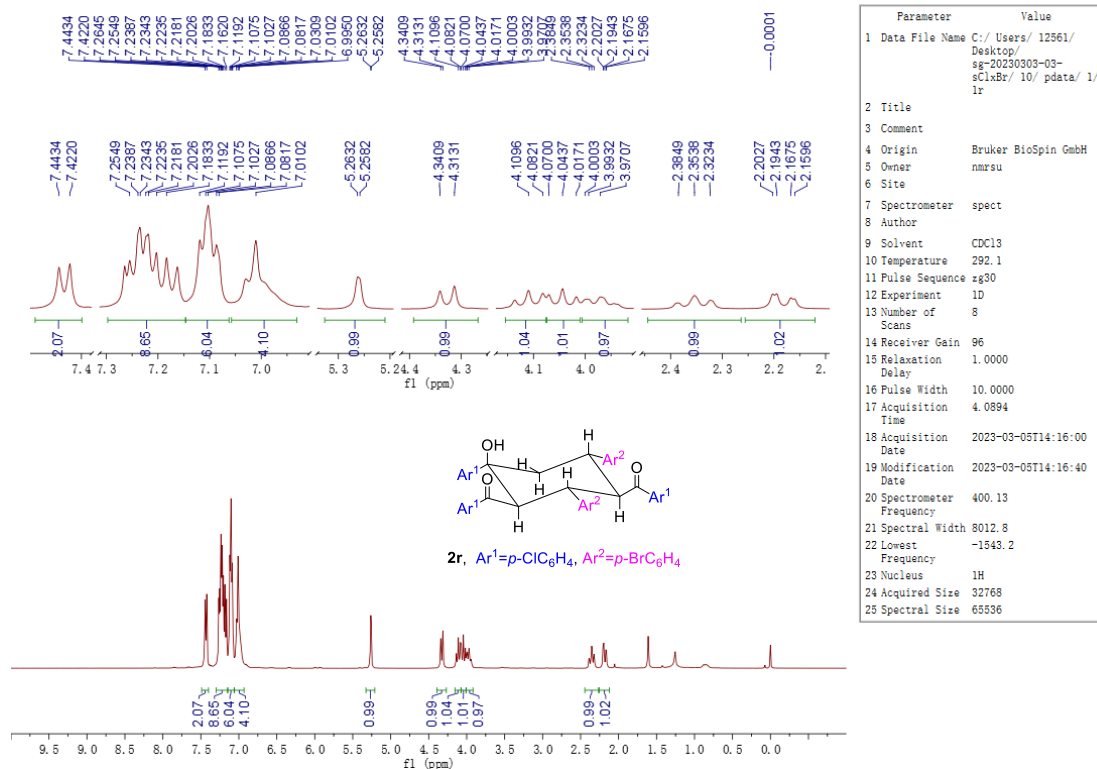

**Figure S26** <sup>1</sup>H NMR (400 MHz, CDCl<sub>3</sub>) of compound **2r**

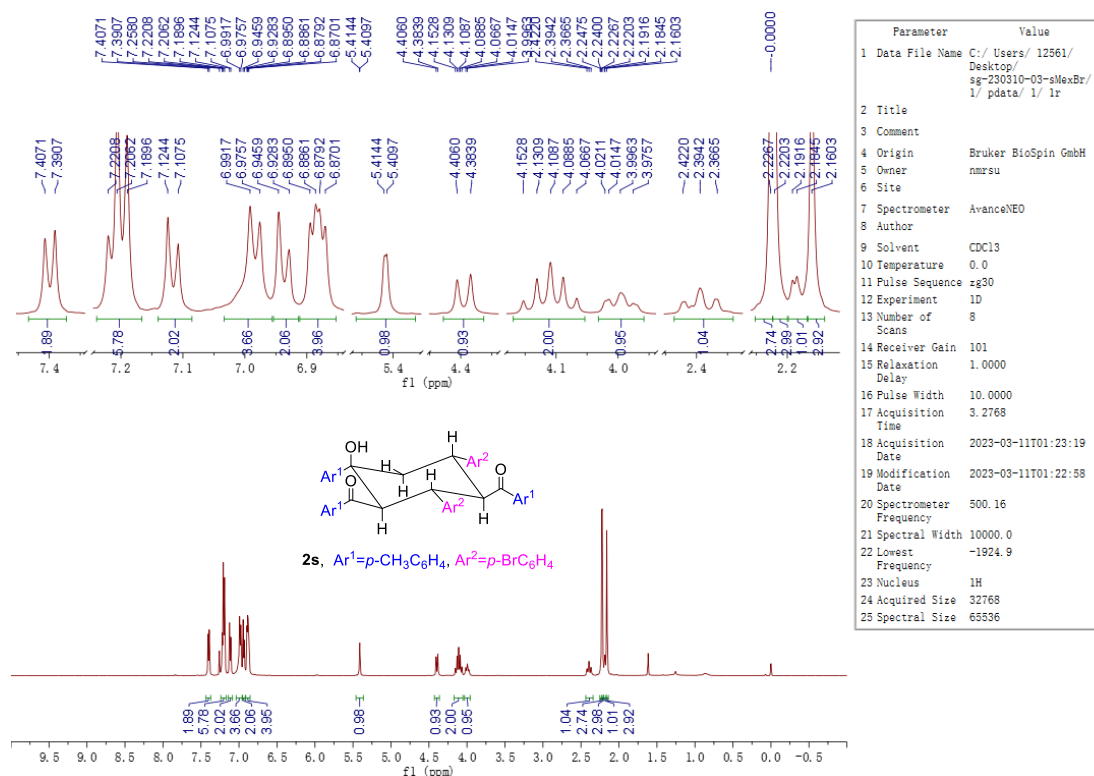

Figure S27 <sup>1</sup>H NMR (500 MHz, CDCl<sub>3</sub>) of compound 2s

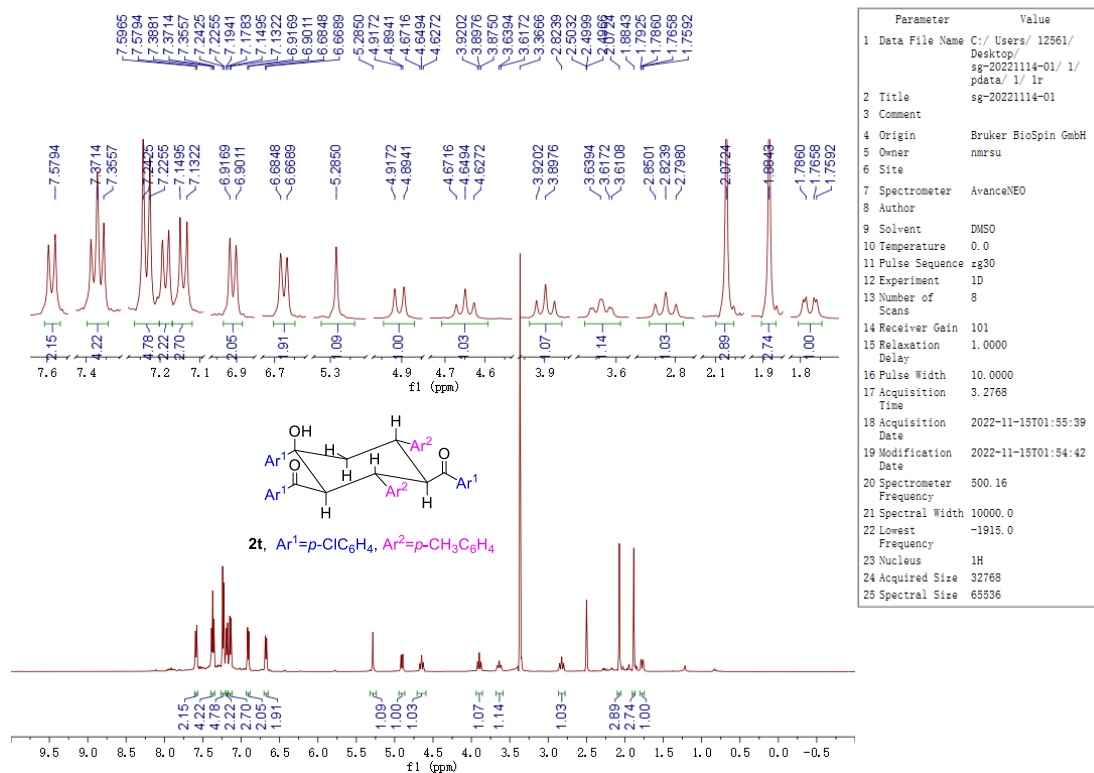

Figure S28 <sup>1</sup>H NMR (500 MHz, DMSO-*d*<sub>6</sub>) of compound 2t

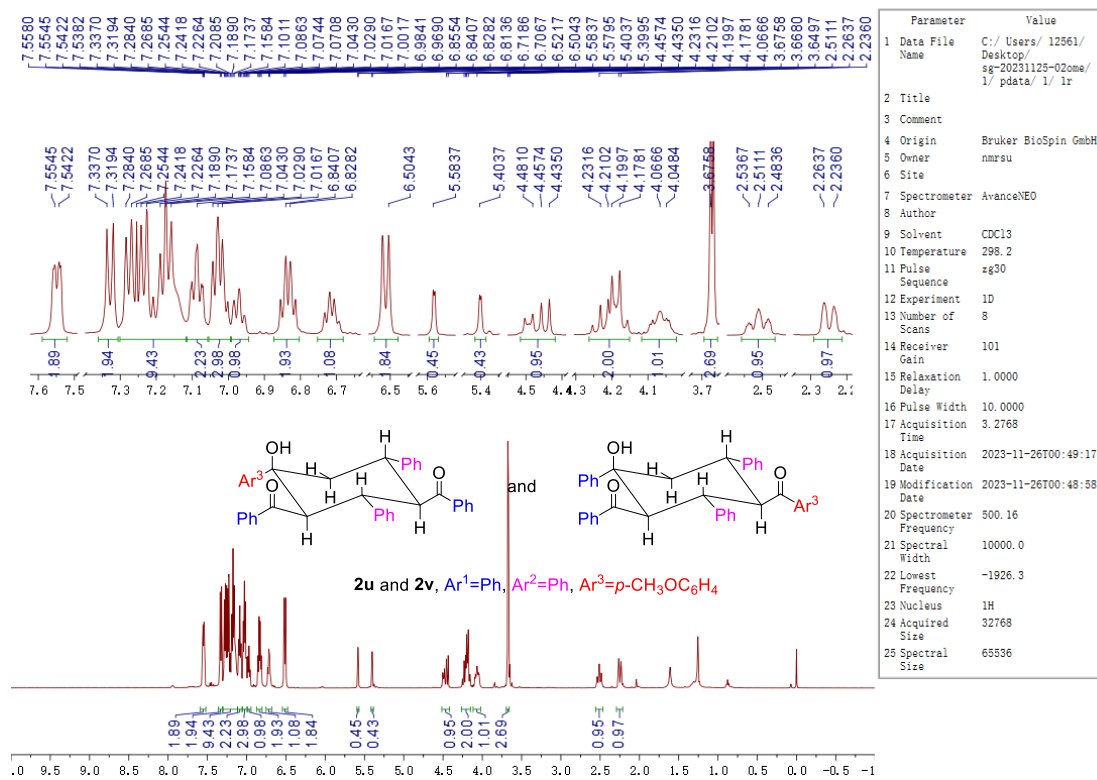

Figure S29 <sup>1</sup>H NMR (500 MHz, CDCl<sub>3</sub>) of compounds **2u** and **2v**

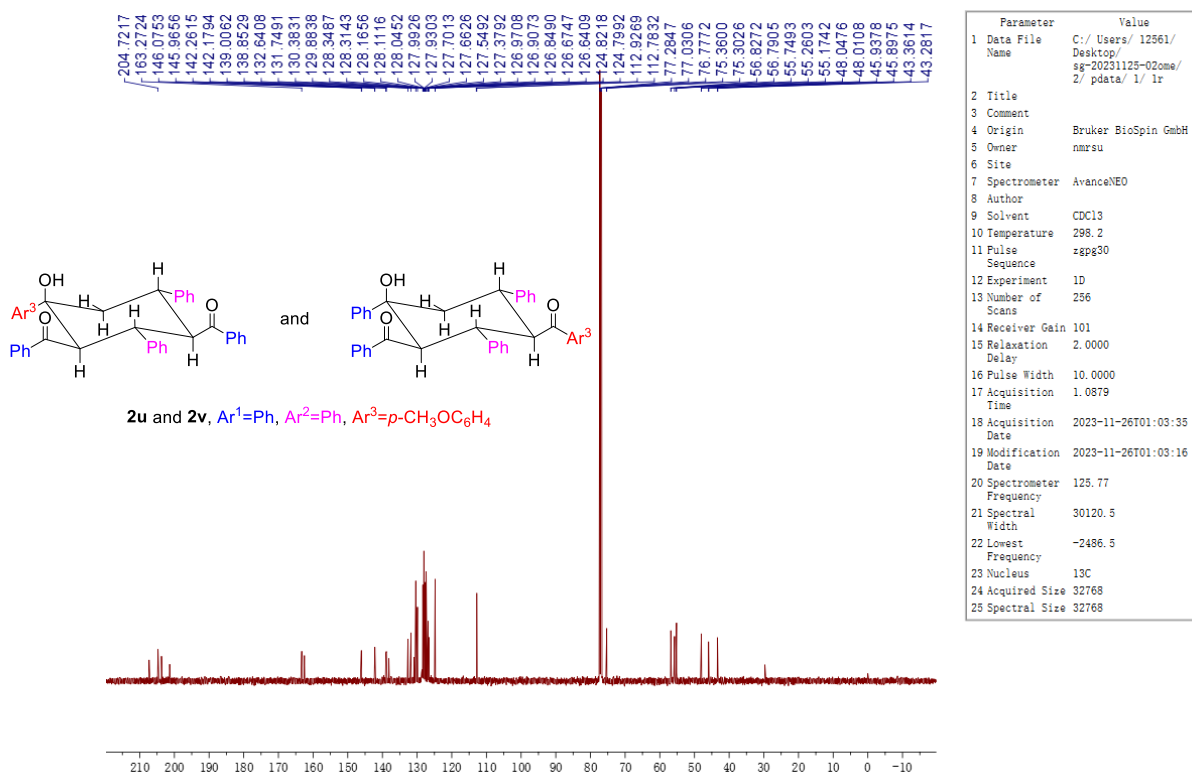

Figure S30 <sup>13</sup>C NMR (126 MHz, CDCl<sub>3</sub>) of compounds **2u** and **2v**

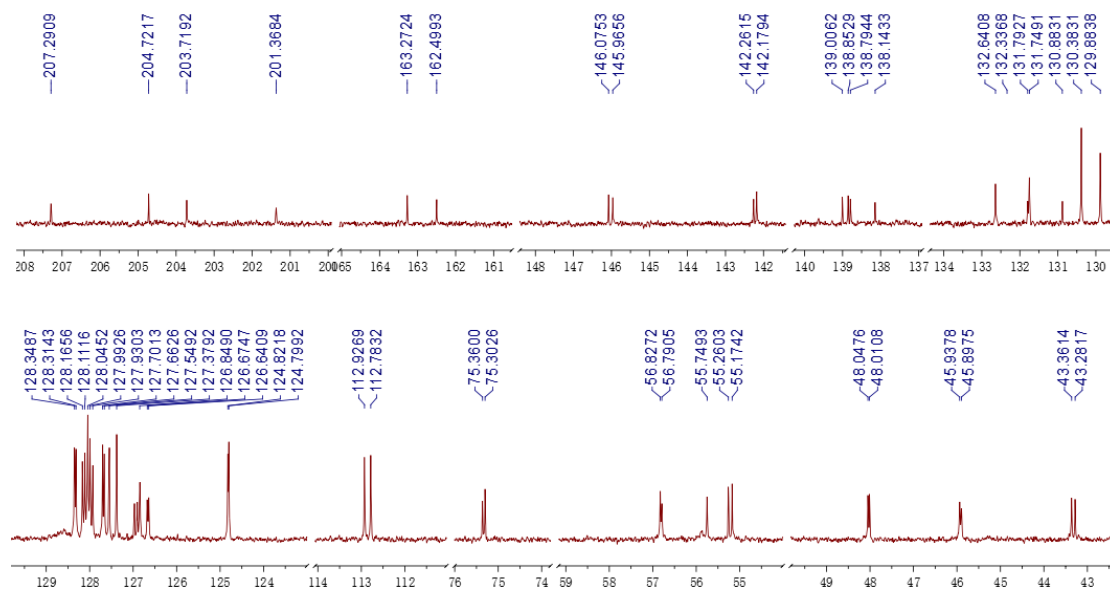

Figure S31 Expanded  $^{13}\text{C}$  NMR (126 MHz,  $\text{CDCl}_3$ ) of compounds **2u** and **2v**

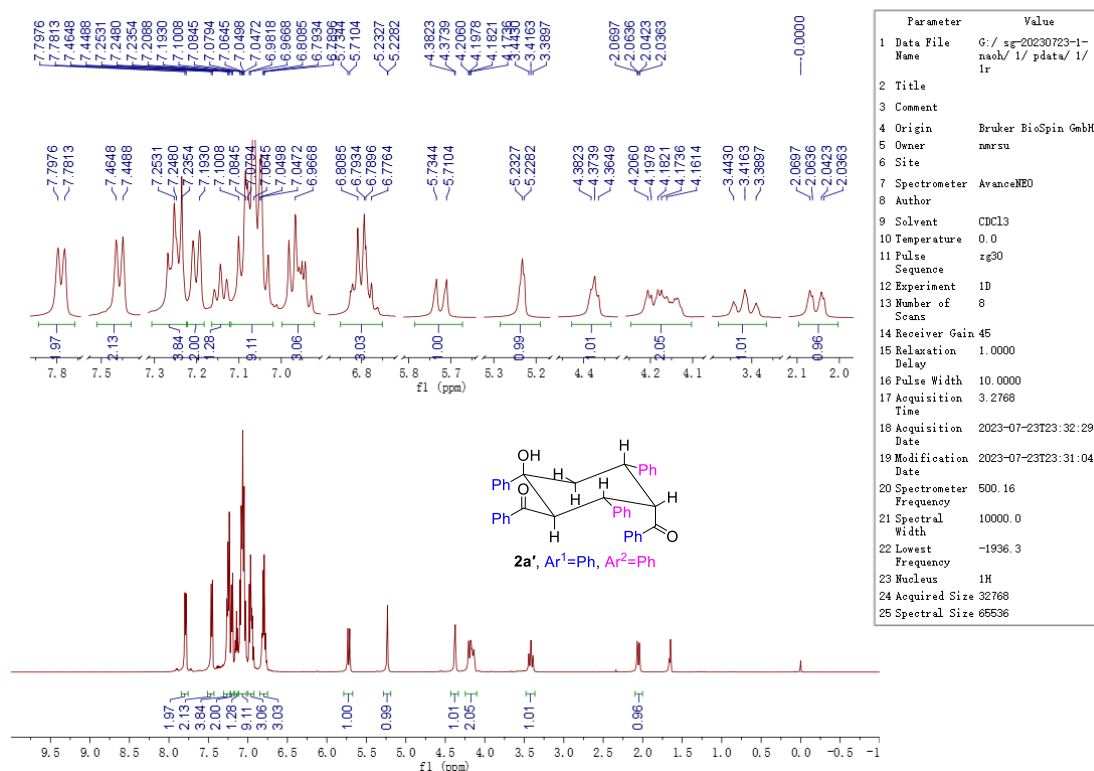

Figure S32  $^1\text{H}$  NMR (500 MHz,  $\text{CDCl}_3$ ) of compound **2a'**

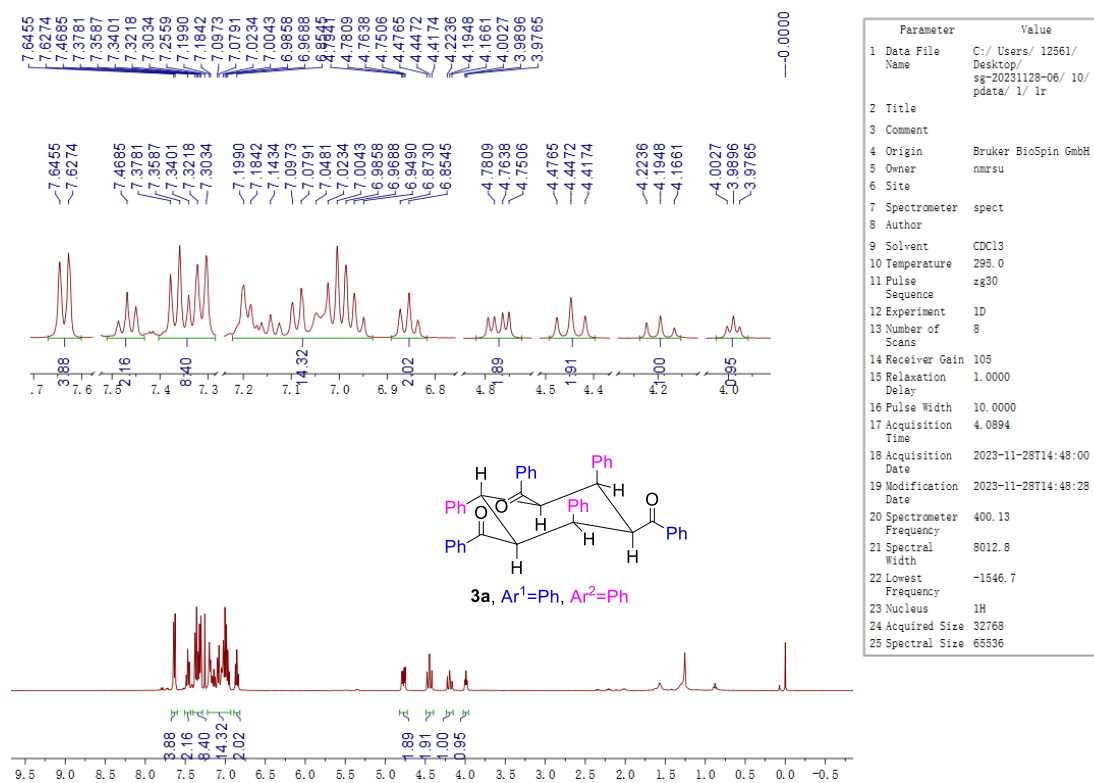

Figure S33 <sup>1</sup>H NMR (500 MHz, CDCl<sub>3</sub>) of compound **3a**

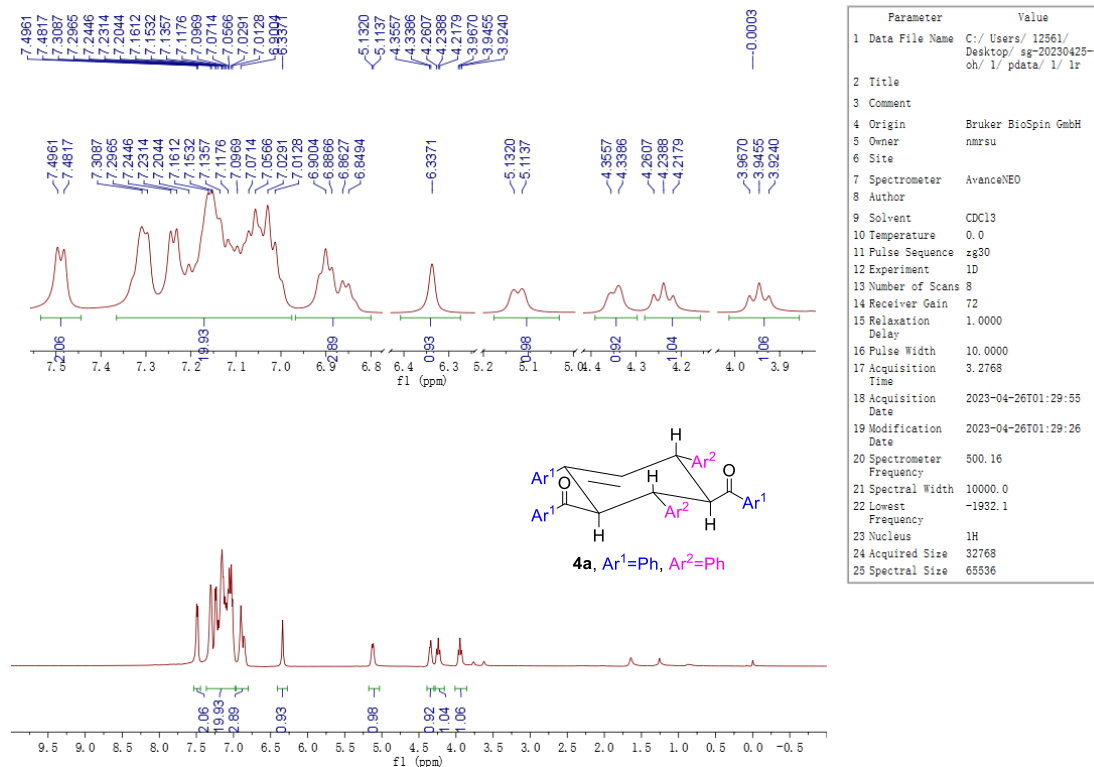

Figure S34 <sup>1</sup>H NMR (500 MHz, CDCl<sub>3</sub>) of compound **4a**



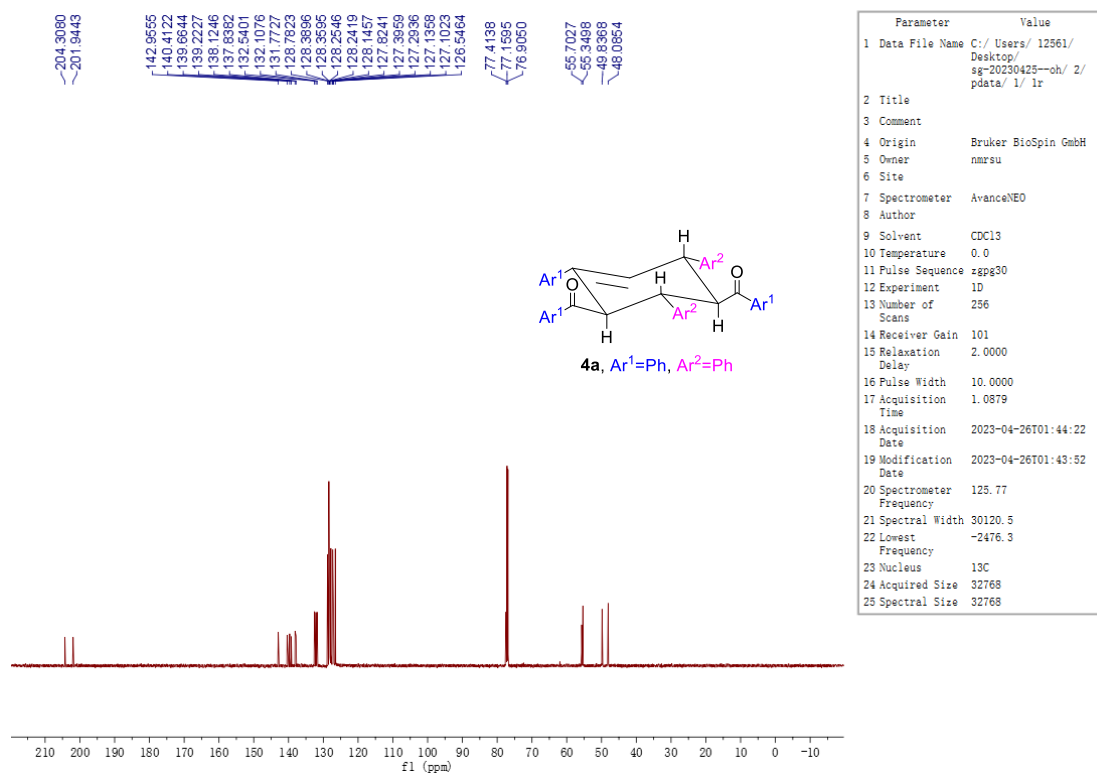

Figure S35 <sup>13</sup>C NMR (126 MHz, CDCl<sub>3</sub>) of compound 4a

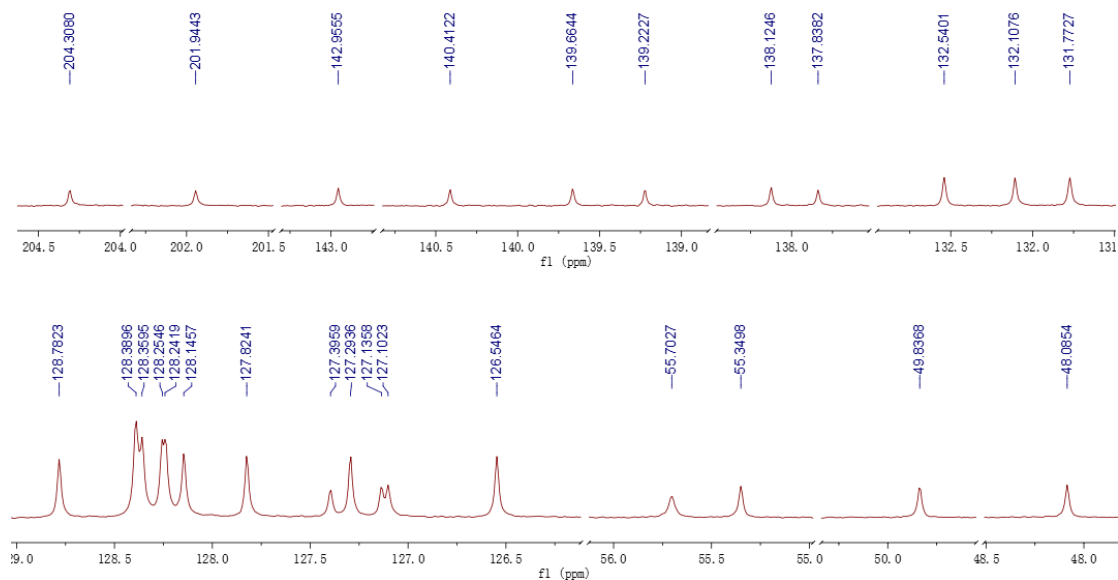

Figure S36 Expanded <sup>13</sup>C NMR (126 MHz, CDCl<sub>3</sub>) of compound 4a

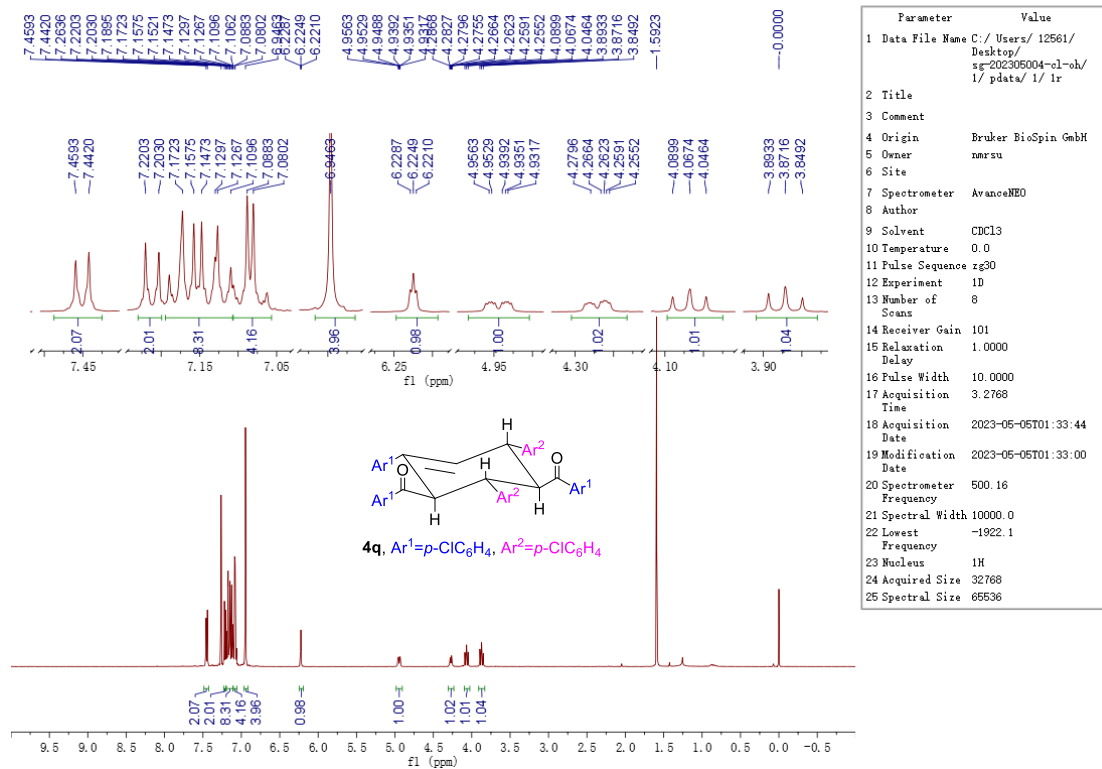

Figure S37  $^1\text{H}$  NMR (500 MHz,  $\text{CDCl}_3$ ) of compound  $4q$
